# Supplementary material for: Varying electronic structural forms of ruthenium complexes of non-innocent 9,10-phenanthrenequinonoid ligands
Source: Royal Society of Chemistry journal article supplement (doi:10.1039/c3dt53104j), 2013-11-14
Supplement: c3dt53104j.pdf [file c3dt53104j.pdf]

## Supporting Information

### Varying electronic structural forms of ruthenium complexes of non-innocent 9,10-phenanthrenequinonoid ligands

Abhishek Mandal,<sup>a</sup> Tanaya Kundu,<sup>a</sup> Fabian Ehret,<sup>b</sup> Martina Bubrin,<sup>b</sup> Shaikh M. Mobin,<sup>c</sup>  
Wolfgang Kaim<sup>\*b</sup> and Goutam Kumar Lahiri<sup>\*a</sup>

<sup>a</sup>Department of Chemistry, Indian Institute of Technology Bombay, Powai, Mumbai 400076,  
India. E-mail: [lahiri@chem.iitb.ac.in](mailto:lahiri@chem.iitb.ac.in)

<sup>b</sup>Institut für Anorganische Chemie, Universität Stuttgart, Pfaffenwaldring 55, D-70550 Stuttgart,  
Germany. E-mail: [kaim@iac.uni-stuttgart.de](mailto:kaim@iac.uni-stuttgart.de)

<sup>c</sup>Discipline of Chemistry, School of Basic Sciences, Indian Institute of Technology Indore, Indore  
452017, India

**Table S1** Experimental (X-ray) bond distances (Å) of **2** (molecule **B**, molecule **C** and molecule **D**)

| Bond distances (Å) |            |                   |           |                   |           |
|--------------------|------------|-------------------|-----------|-------------------|-----------|
| Molecule <b>B</b>  |            | Molecule <b>C</b> |           | Molecule <b>D</b> |           |
| Ru(2)-N(3)         | 1.962(2)   | Ru(3)-N(5)        | 1.972(2)  | Ru(4)-N(7)#1      | 1.960(2)  |
| Ru(2)-N(4)         | 1.964(2)   | Ru(3)-N(6)        | 1.952(2)  | Ru(4)-N(7)        | 1.960(2)  |
| Ru(2)-O(5)         | 2.0541(18) | Ru(3)-O(9)        | 2.053(2)  | Ru(4)-O(13)       | 2.031(2)  |
| Ru(2)-O(6)         | 2.075(19)  | Ru(3)-O(10)       | 2.079(18) | Ru(4)-O(13)#1     | 2.031(2)  |
| Ru(2)-O(7)         | 2.0612(18) | Ru(3)-O(11)       | 2.062(2)  | Ru(4)-O(14)       | 2.087(19) |
| Ru(2)-O(8)         | 1.997(19)  | Ru(3)-O(12)       | 2.017(2)  | Ru(4)-O(14)#1     | 2.087(19) |
| C(25)-N(3)         | 1.325(4)   | C(49)-N(5)        | 1.319(4)  | C(73)-N(7)        | 1.310(4)  |
| C(38)-N(4)         | 1.312(4)   | C(62)-N(6)        | 1.320(4)  | C(73)-C(73)#1     | 1.451(5)  |
| C(25)-C(26)        | 1.451(4)   | C(49)-C(50)       | 1.454(4)  | C(73)-C(74)       | 1.453(4)  |
| C(25)-C(38)        | 1.437(4)   | C(49)-C(62)       | 1.437(4)  | C(74)-C(75)       | 1.408(4)  |
| C(26)-C(27)        | 1.407(4)   | C(50)-C(51)       | 1.402(4)  | C(74)-C(79)       | 1.415(4)  |
| C(26)-C(31)        | 1.415(4)   | C(50)-C(55)       | 1.422(4)  | C(75)-C(76)       | 1.374(4)  |
| C(27)-C(28)        | 1.365(4)   | C(51)-C(52)       | 1.374(4)  | C(76)-C(77)       | 1.383(5)  |
| C(28)-C(29)        | 1.386(5)   | C(52)-C(53)       | 1.387(5)  | C(77)-C(78)       | 1.377(4)  |
| C(29)-C(30)        | 1.371(5)   | C(53)-C(54)       | 1.370(4)  | C(78)-C(79)       | 1.400(4)  |
| C(30)-C(31)        | 1.398(4)   | C(54)-C(55)       | 1.397(4)  | C(79)-C(79)#1     | 1.477(5)  |
| C(31)-C(32)        | 1.472(4)   | C(55)-C(56)       | 1.476(4)  |                   |           |
| C(32)-C(33)        | 1.410(4)   | C(56)-C(57)       | 1.415(4)  |                   |           |
| C(32)-C(37)        | 1.403(4)   | C(56)-C(61)       | 1.408(4)  |                   |           |
| C(33)-C(34)        | 1.367(5)   | C(57)-C(58)       | 1.371(5)  |                   |           |
| C(34)-C(35)        | 1.383(5)   | C(58)-C(59)       | 1.384(5)  |                   |           |
| C(35)-C(36)        | 1.376(4)   | C(59)-C(60)       | 1.375(4)  |                   |           |
| C(36)-C(37)        | 1.397(4)   | C(60)-C(61)       | 1.398(4)  |                   |           |
| C(37)-C(38)        | 1.463(4)   | C(61)-C(62)       | 1.456(4)  |                   |           |

**Table S2** Experimental bond distances (Å) of **3** (molecule **E**)

| Bond distances (Å) |            |
|--------------------|------------|
| Ru(1)-N(1)         | 1.9341(18) |
| Ru(1)-O(1)         | 2.0412(15) |
| Ru(1)-O(2)         | 2.0195(15) |
| Ru(1)-O(3)         | 2.0111(16) |
| Ru(1)-O(4)         | 2.0704(15) |
| Ru(1)-O(5)         | 2.0502(15) |
| C(1)-N(1)          | 1.332(3)   |
| C(14)-O(1)         | 1.287(3)   |
| C(1)-C(2)          | 1.451(3)   |
| C(1)-C(14)         | 1.433(3)   |
| C(2)-C(3)          | 1.401(3)   |
| C(2)-C(7)          | 1.416(3)   |
| C(3)-C(4)          | 1.378(3)   |
| C(4)-C(5)          | 1.387(4)   |
| C(5)-C(6)          | 1.373(4)   |
| C(6)-C(7)          | 1.408(3)   |
| C(7)-C(8)          | 1.471(3)   |
| C(8)-C(9)          | 1.406(3)   |
| C(8)-C(13)         | 1.413(3)   |
| C(9)-C(10)         | 1.373(4)   |
| C(10)-C(11)        | 1.387(4)   |
| C(11)-C(12)        | 1.379(3)   |
| C(12)-C(13)        | 1.404(3)   |
| C(13)-C(14)        | 1.445(3)   |

**Table S3** Experimental (X-ray) and DFT calculated selected bond angles (°) of **1<sup>n</sup>**

|                 | X-ray      | DFT                                      |                            |                                          |                                         |
|-----------------|------------|------------------------------------------|----------------------------|------------------------------------------|-----------------------------------------|
|                 |            | <b>1<sup>+</sup></b><br>( <i>S</i> =1/2) | <b>1</b><br>( <i>S</i> =0) | <b>1<sup>-</sup></b><br>( <i>S</i> =1/2) | <b>1<sup>2-</sup></b><br>( <i>S</i> =0) |
| O(1)-Ru(1)-O(2) | 80.88(11)  | 76.18                                    | 78.29                      | 80.37                                    | 80.45                                   |
| O(1)-Ru(1)-O(3) | 92.00(12)  | 88.78                                    | 90.86                      | 90.57                                    | 89.89                                   |
| O(1)-Ru(1)-O(4) | 174.05(10) | 173.50                                   | 174.75                     | 175.89                                   | 176.27                                  |
| O(1)-Ru(1)-O(5) | 96.41(12)  | 97.47                                    | 97.11                      | 95.96                                    | 96.22                                   |
| O(1)-Ru(1)-O(6) | 87.51(12)  | 90.76                                    | 90.40                      | 90.12                                    | 89.61                                   |
| O(2)-Ru(1)-O(3) | 91.83(12)  | 90.73                                    | 91.96                      | 90.52                                    | 89.71                                   |
| O(2)-Ru(1)-O(4) | 94.60(12)  | 97.35                                    | 96.64                      | 95.77                                    | 96.04                                   |
| O(2)-Ru(1)-O(5) | 177.27(10) | 173.62                                   | 175.39                     | 176.18                                   | 176.49                                  |
| O(2)-Ru(1)-O(6) | 86.33(12)  | 88.72                                    | 89.50                      | 90.12                                    | 89.69                                   |
| O(3)-Ru(1)-O(4) | 91.99(12)  | 90.68                                    | 90.67                      | 90.86                                    | 91.35                                   |
| O(3)-Ru(1)-O(5) | 88.56(12)  | 89.76                                    | 87.82                      | 88.45                                    | 89.18                                   |
| O(3)-Ru(1)-O(6) | 178.14(10) | 179.36                                   | 178.24                     | 179.13                                   | 179.27                                  |
| O(4)-Ru(1)-O(5) | 88.09(12)  | 89.01                                    | 87.98                      | 87.92                                    | 87.31                                   |
| O(4)-Ru(1)-O(6) | 88.36(12)  | 89.72                                    | 88.19                      | 88.48                                    | 89.12                                   |
| O(5)-Ru(1)-O(6) | 93.27(12)  | 90.76                                    | 90.80                      | 90.96                                    | 91.40                                   |

**Table S4** Experimental and DFT calculated selected bond angles (°) of **2<sup>n</sup>** (molecule **A**)

|                 | X-ray     | DFT                                      |                            |                                          |                                         |
|-----------------|-----------|------------------------------------------|----------------------------|------------------------------------------|-----------------------------------------|
|                 |           | <b>2<sup>+</sup></b><br>( <i>S</i> =1/2) | <b>2</b><br>( <i>S</i> =0) | <b>2<sup>-</sup></b><br>( <i>S</i> =1/2) | <b>2<sup>2-</sup></b><br>( <i>S</i> =0) |
| N(1)-Ru(1)-N(2) | 78.07(9)  | 75.89                                    | 76.79                      | 77.11                                    | 76.35                                   |
| N(1)-Ru(1)-O(1) | 89.55(9)  | 88.16                                    | 90.56                      | 90.55                                    | 90.05                                   |
| N(1)-Ru(1)-O(2) | 173.10(8) | 172.82                                   | 174.11                     | 173.40                                   | 174.32                                  |
| N(1)-Ru(1)-O(3) | 99.49(9)  | 97.47                                    | 97.33                      | 97.43                                    | 98.11                                   |
| N(1)-Ru(1)-O(4) | 93.00(9)  | 93.84                                    | 94.01                      | 92.28                                    | 91.51                                   |
| N(2)-Ru(1)-O(1) | 91.23(9)  | 93.86                                    | 94.00                      | 92.36                                    | 91.53                                   |
| N(2)-Ru(1)-O(2) | 95.11(9)  | 97.52                                    | 97.33                      | 97.32                                    | 98.00                                   |
| N(2)-Ru(1)-O(3) | 176.87(8) | 172.74                                   | 174.11                     | 174.53                                   | 174.45                                  |
| N(2)-Ru(1)-O(4) | 91.77(8)  | 88.14                                    | 90.49                      | 90.40                                    | 89.93                                   |
| O(1)-Ru(1)-O(2) | 91.67(8)  | 89.46                                    | 90.03                      | 90.23                                    | 90.63                                   |
| O(1)-Ru(1)-O(3) | 86.76(8)  | 88.79                                    | 85.98                      | 87.31                                    | 88.04                                   |
| O(1)-Ru(1)-O(4) | 176.41(8) | 177.47                                   | 174.22                     | 176.42                                   | 178.08                                  |
| O(2)-Ru(1)-O(3) | 87.35(8)  | 89.26                                    | 88.55                      | 88.15                                    | 87.54                                   |
| O(2)-Ru(1)-O(4) | 86.09(8)  | 88.74                                    | 85.79                      | 87.17                                    | 87.93                                   |
| O(3)-Ru(1)-O(4) | 90.33(8)  | 89.41                                    | 89.92                      | 90.15                                    | 90.62                                   |

**Table S5** Experimental (X-ray) and DFT calculated selected bond angles (°) of **3<sup>n</sup>** (molecule **F**)

|                  | X-ray     | DFT                                      |                            |                                          |                                         |
|------------------|-----------|------------------------------------------|----------------------------|------------------------------------------|-----------------------------------------|
|                  |           | <b>3<sup>+</sup></b><br>( <i>S</i> =1/2) | <b>3</b><br>( <i>S</i> =0) | <b>3<sup>-</sup></b><br>( <i>S</i> =1/2) | <b>3<sup>2-</sup></b><br>( <i>S</i> =0) |
| N(2)-Ru(2)-O(6)  | 79.36(7)  | 76.16                                    | 77.45                      | 78.69                                    | 78.57                                   |
| N(2)-Ru(2)-O(7)  | 174.91(7) | 172.90                                   | 175.23                     | 174.98                                   | 174.76                                  |
| N(2)-Ru(2)-O(8)  | 91.42(6)  | 88.20                                    | 90.59                      | 90.45                                    | 89.71                                   |
| N(2)-Ru(2)-O(9)  | 96.11(7)  | 97.79                                    | 96.50                      | 97.08                                    | 97.84                                   |
| N(2)-Ru(2)-O(10) | 91.79(7)  | 93.50                                    | 95.50                      | 92.49                                    | 91.03                                   |
| O(6)-Ru(2)-O(7)  | 96.26(6)  | 97.07                                    | 97.79                      | 96.30                                    | 96.22                                   |
| O(6)-Ru(2)-O(8)  | 90.47(6)  | 91.46                                    | 91.26                      | 90.79                                    | 90.33                                   |
| O(6)-Ru(2)-O(9)  | 174.25(6) | 173.60                                   | 173.83                     | 175.66                                   | 176.28                                  |
| O(6)-Ru(2)-O(10) | 90.61(6)  | 88.24                                    | 89.97                      | 89.79                                    | 89.64                                   |
| O(7)-Ru(2)-O(8)  | 91.21(6)  | 89.86                                    | 89.15                      | 89.89                                    | 90.81                                   |
| O(7)-Ru(2)-O(9)  | 88.41(6)  | 89.05                                    | 88.26                      | 87.94                                    | 87.38                                   |
| O(7)-Ru(2)-O(10) | 85.63(6)  | 88.37                                    | 85.80                      | 87.19                                    | 88.44                                   |
| O(8)-Ru(2)-O(9)  | 86.08(6)  | 90.42                                    | 87.57                      | 88.26                                    | 88.68                                   |
| O(8)-Ru(2)-O(10) | 176.76(6) | 178.15                                   | 174.92                     | 177.07                                   | 179.25                                  |
| O(9)-Ru(2)-O(10) | 93.08(6)  | 90.07                                    | 91.73                      | 91.38                                    | 91.40                                   |

**Table S6**  $^1\text{H}$  NMR spectral data of **1**, **2** and **3** in  $\text{CDCl}_3$

| Complex  | N-H                | $\delta$ (J/Hz)                                                                                                              |                                       |                                                                                  |
|----------|--------------------|------------------------------------------------------------------------------------------------------------------------------|---------------------------------------|----------------------------------------------------------------------------------|
|          |                    | Q ligand                                                                                                                     | acac ligand                           |                                                                                  |
|          |                    |                                                                                                                              | C-H                                   | CH <sub>3</sub>                                                                  |
| <b>1</b> | -                  | 8.63(8.2) <sup>a</sup> , 8.54(7.96) <sup>a</sup> ,<br>7.86(7.6) <sup>b</sup> , 6.99(6.79) <sup>b</sup>                       | 5.22 <sup>c</sup>                     | 2.67 <sup>c</sup> , 2.09 <sup>c</sup>                                            |
| <b>2</b> | 11.55 <sup>c</sup> | 8.53(9.04) <sup>a</sup> , 8.40(9.28) <sup>a</sup> , 7.59 <sup>d</sup>                                                        | 5.47 <sup>c</sup>                     | 2.39 <sup>c</sup> , 1.77 <sup>c</sup>                                            |
| <b>3</b> | 14.04 <sup>c</sup> | 9.05(8.02) <sup>a</sup> , 8.68(7.88) <sup>a</sup> ,<br>8.38(8.24) <sup>b</sup> , 7.85(7.66) <sup>b</sup> , 7.58 <sup>d</sup> | 5.65 <sup>c</sup> , 5.46 <sup>c</sup> | 2.59 <sup>c</sup> , 2.34 <sup>c</sup> , 2.01 <sup>c</sup> ,<br>1.97 <sup>c</sup> |

<sup>a</sup>Doublet.

<sup>b</sup> Doublet of doublet.

<sup>c</sup>Singlet.

<sup>d</sup>Owing to overlapping it does not seem possible to determine  $J$  values for doublets or triplets unequivocally.

**Table S7** Selected molecular orbitals along with their energies and compositions of **1** in  $S = 0$

state

| MO      | Energy<br>(eV) | % Composition |      |                |
|---------|----------------|---------------|------|----------------|
|         |                | Ru            | acac | Q <sub>1</sub> |
| LUMO+10 | 1.335          | 76            | 17   | 7              |
| LUMO+9  | 1.208          | 69            | 23   | 8              |
| LUMO+8  | 0.724          | 3             | 1    | 96             |
| LUMO+7  | 0.230          | 49            | 40   | 11             |
| LUMO+6  | 0.184          | 49            | 26   | 25             |
| LUMO+5  | 0.169          | 1             | 1    | 98             |
| LUMO+4  | -0.645         | 5             | 94   | 1              |
| LUMO+3  | -0.707         | 5             | 92   | 3              |
| LUMO+2  | -0.952         | 1             | 2    | 97             |
| LUMO+1  | -1.135         | 1             | 0    | 99             |
| LUMO    | -3.222         | 35            | 9    | 56             |
| HOMO    | -4.942         | 61            | 31   | 8              |
| HOMO-1  | -5.159         | 49            | 24   | 27             |
| HOMO-2  | -5.257         | 65            | 17   | 18             |
| HOMO-3  | -6.090         | 19            | 74   | 7              |
| HOMO-4  | -6.256         | 15            | 53   | 32             |
| HOMO-5  | -6.397         | 10            | 24   | 66             |
| HOMO-6  | -6.915         | 5             | 90   | 5              |
| HOMO-7  | -7.167         | 2             | 5    | 93             |
| HOMO-8  | -7.351         | 6             | 33   | 61             |
| HOMO-9  | -7.448         | 8             | 59   | 33             |
| HOMO-10 | -7.882         | 11            | 72   | 17             |



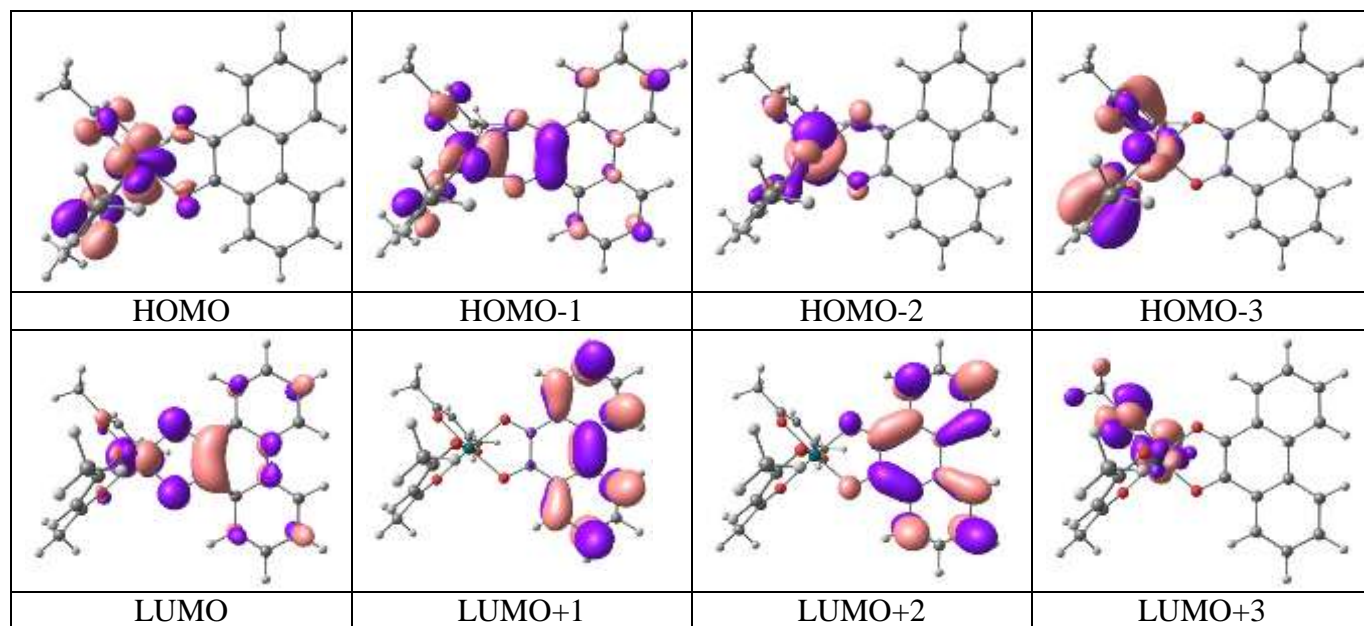

**Table S8** Selected molecular orbitals along with their energies and compositions of  $\mathbf{1}^+$  in  $S = 1/2$

state

| MO             | Energy<br>(eV) | % Composition |      |                |
|----------------|----------------|---------------|------|----------------|
|                |                | Ru            | acac | Q <sub>1</sub> |
| $\alpha$ -spin |                |               |      |                |
| LUMO+10        | -1.512         | 76            | 16   | 8              |
| LUMO+9         | -1.538         | 68            | 20   | 12             |
| LUMO+8         | -2.331         | 0             | 0    | 100            |
| LUMO+7         | -2.912         | 0             | 0    | 100            |
| LUMO+6         | -3.527         | 16            | 80   | 4              |
| LUMO+5         | -3.992         | 2             | 96   | 2              |
| LUMO+4         | -4.143         | 3             | 2    | 93             |
| LUMO+3         | -4.183         | 9             | 7    | 84             |
| LUMO+2         | -4.215         | 40            | 42   | 18             |
| LUMO+1         | -4.231         | 56            | 21   | 23             |
| LUMO           | -6.746         | 9             | 3    | 88             |
| SOMO           | -8.829         | 22            | 72   | 6              |
| HOMO-1         | -9.313         | 17            | 79   | 4              |
| HOMO-2         | -9.371         | 8             | 2    | 90             |
| HOMO-3         | -9.505         | 63            | 20   | 17             |
| HOMO-4         | -9.561         | 37            | 43   | 20             |
| HOMO-5         | -10.192        | 17            | 8    | 75             |
| HOMO-6         | -10.444        | 6             | 83   | 11             |
| HOMO-7         | -10.446        | 31            | 45   | 24             |
| HOMO-8         | -10.618        | 16            | 23   | 61             |
| HOMO-9         | -11.101        | 4             | 12   | 84             |
| HOMO-10        | -11.102        | 32            | 61   | 7              |
| $\beta$ -spin  |                |               |      |                |
| LUMO+10        | -1.535         | 68            | 20   | 12             |
| LUMO+9         | -2.341         | 0             | 0    | 100            |

|         |         |    |    |     |
|---------|---------|----|----|-----|
| LUMO+8  | -2.929  | 0  | 0  | 100 |
| LUMO+7  | -3.244  | 53 | 39 | 8   |
| LUMO+6  | -3.734  | 4  | 93 | 3   |
| LUMO+5  | -4.109  | 11 | 86 | 3   |
| LUMO+4  | -4.127  | 52 | 24 | 24  |
| LUMO+3  | -4.157  | 0  | 0  | 99  |
| LUMO+2  | -4.221  | 5  | 1  | 94  |
| LUMO+1  | -6.279  | 70 | 24 | 6   |
| LUMO    | -6.732  | 24 | 7  | 69  |
| HOMO    | -8.969  | 28 | 52 | 20  |
| HOMO-1  | -9.048  | 51 | 37 | 12  |
| HOMO-2  | -9.225  | 8  | 18 | 74  |
| HOMO-3  | -9.477  | 32 | 45 | 23  |
| HOMO-4  | -9.615  | 44 | 45 | 11  |
| HOMO-5  | -10.278 | 4  | 66 | 29  |
| HOMO-6  | -10.377 | 3  | 41 | 56  |
| HOMO-7  | -10.596 | 8  | 12 | 80  |
| HOMO-8  | -10.891 | 9  | 82 | 9   |
| HOMO-9  | -11.112 | 1  | 4  | 95  |
| HOMO-10 | -11.518 | 17 | 71 | 12  |

---

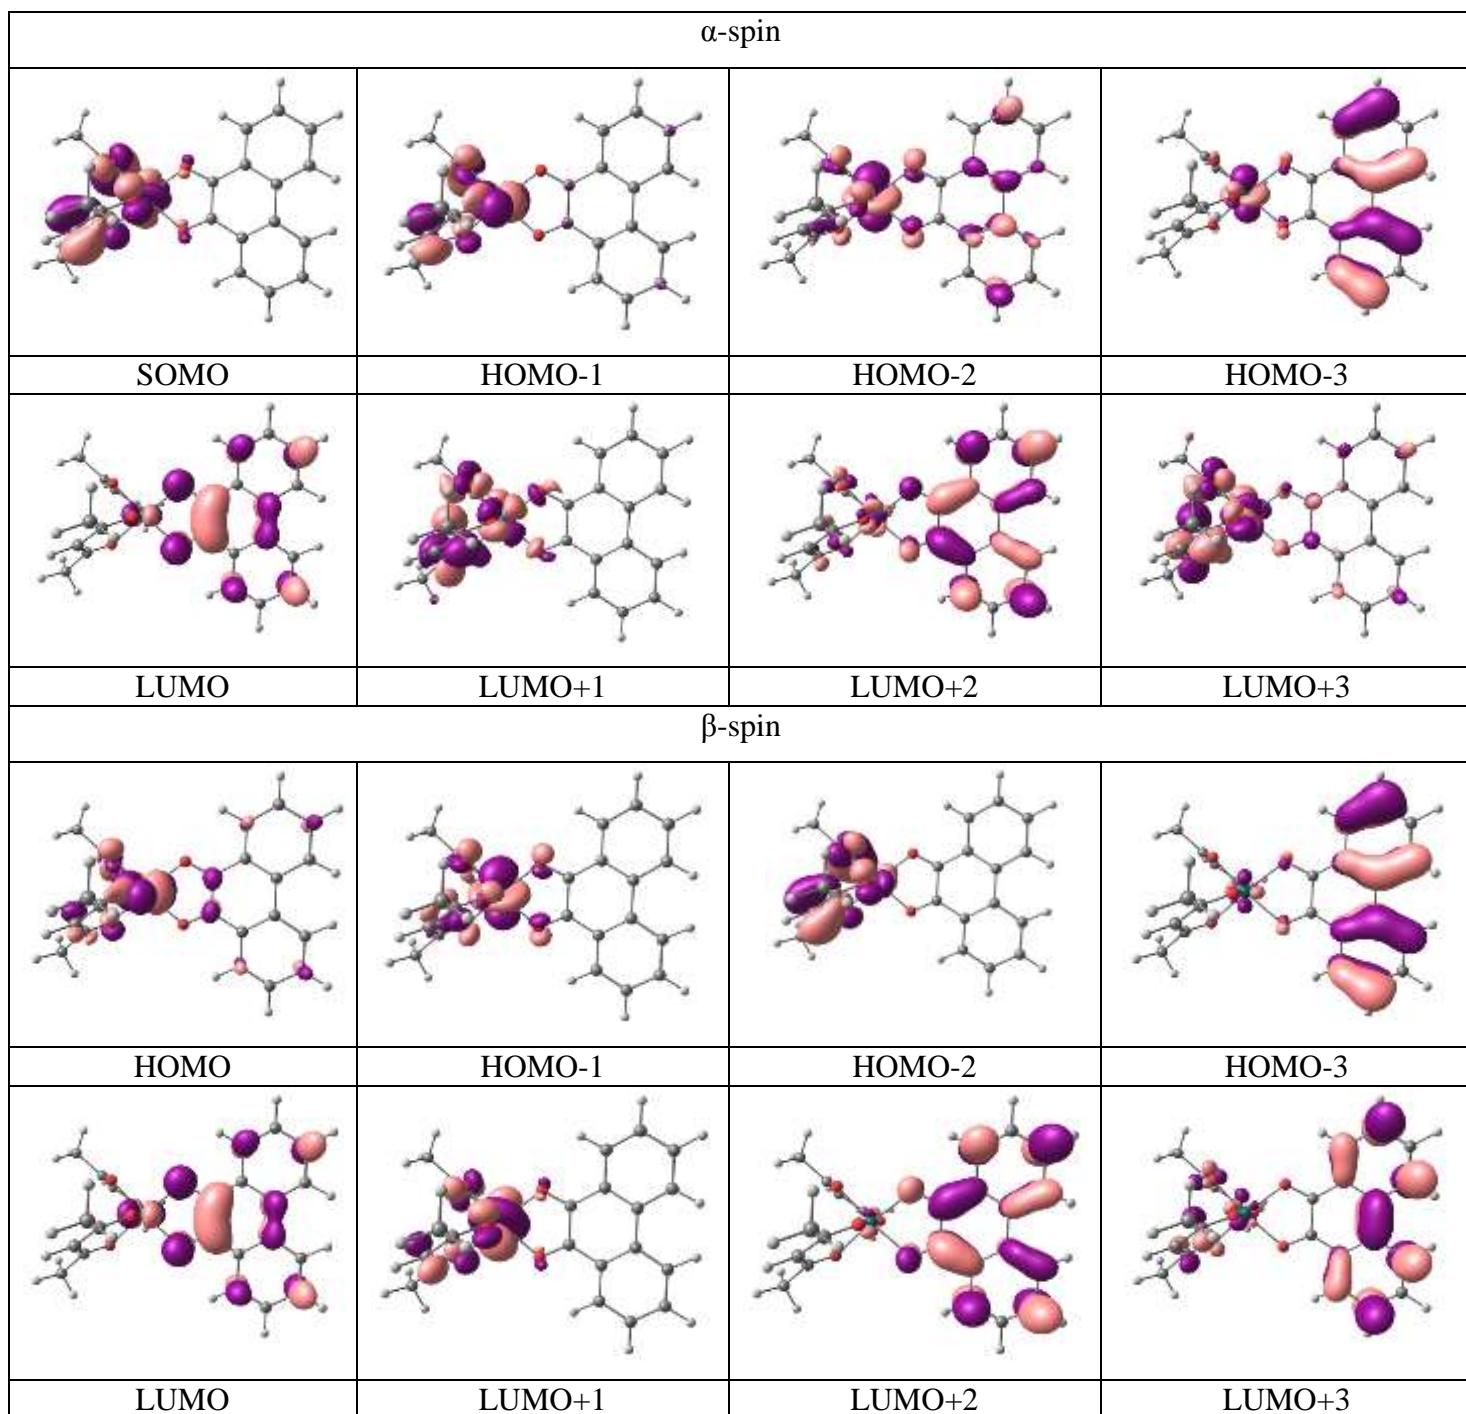

**Table S9** Selected molecular orbitals along with their energies and compositions of  $\mathbf{1}^-$  in  $S = 1/2$

state

| MO             | Energy<br>(eV) | % Composition |      |                |
|----------------|----------------|---------------|------|----------------|
|                |                | Ru            | acac | Q <sub>1</sub> |
| $\alpha$ -spin |                |               |      |                |
| LUMO+10        | 4.082          | 58            | 34   | 8              |
| LUMO+9         | 4.075          | 60            | 29   | 11             |
| LUMO+8         | 4.027          | 15            | 12   | 73             |
| LUMO+7         | 3.951          | 40            | 32   | 28             |
| LUMO+6         | 3.788          | 54            | 38   | 8              |
| LUMO+5         | 3.681          | 59            | 34   | 7              |
| LUMO+4         | 3.493          | 0             | 0    | 99             |
| LUMO+3         | 2.457          | 5             | 40   | 55             |
| LUMO+2         | 2.400          | 3             | 61   | 36             |
| LUMO+1         | 2.356          | 2             | 96   | 2              |
| LUMO           | 2.169          | 1             | 0    | 99             |
| SOMO           | -0.906         | 19            | 5    | 76             |
| HOMO-1         | -1.407         | 69            | 20   | 11             |
| HOMO-2         | -1.648         | 76            | 16   | 8              |
| HOMO-3         | -2.147         | 53            | 29   | 17             |
| HOMO-4         | -2.969         | 15            | 79   | 6              |
| HOMO-5         | -2.973         | 6             | 43   | 51             |
| HOMO-6         | -3.093         | 9             | 45   | 46             |
| HOMO-7         | -3.729         | 3             | 10   | 86             |
| HOMO-8         | -3.789         | 2             | 6    | 93             |
| HOMO-9         | -3.899         | 11            | 31   | 57             |
| HOMO-10        | -4.065         | 4             | 8    | 88             |
| $\beta$ -spin  |                |               |      |                |
| LUMO+10        | 4.093          | 51            | 40   | 9              |
| LUMO+9         | 4.037          | 5             | 3    | 93             |

|         |        |    |    |    |
|---------|--------|----|----|----|
| LUMO+8  | 4.008  | 54 | 32 | 14 |
| LUMO+7  | 3.945  | 58 | 34 | 7  |
| LUMO+6  | 3.832  | 58 | 35 | 6  |
| LUMO+5  | 3.669  | 5  | 4  | 91 |
| LUMO+4  | 2.631  | 2  | 3  | 96 |
| LUMO+3  | 2.426  | 7  | 90 | 3  |
| LUMO+2  | 2.399  | 5  | 92 | 3  |
| LUMO+1  | 2.207  | 1  | 2  | 97 |
| LUMO    | 0.918  | 32 | 10 | 57 |
| HOMO    | -1.217 | 62 | 17 | 21 |
| HOMO-1  | -1.235 | 58 | 17 | 25 |
| HOMO-2  | -1.422 | 75 | 16 | 9  |
| HOMO-3  | -2.856 | 5  | 92 | 3  |
| HOMO-4  | -2.896 | 3  | 29 | 68 |
| HOMO-5  | -3.054 | 9  | 60 | 31 |
| HOMO-6  | -3.640 | 2  | 5  | 94 |
| HOMO-7  | -3.692 | 3  | 86 | 11 |
| HOMO-8  | -3.820 | 11 | 28 | 60 |
| HOMO-9  | -3.850 | 4  | 6  | 90 |
| HOMO-10 | -4.393 | 6  | 55 | 38 |

---

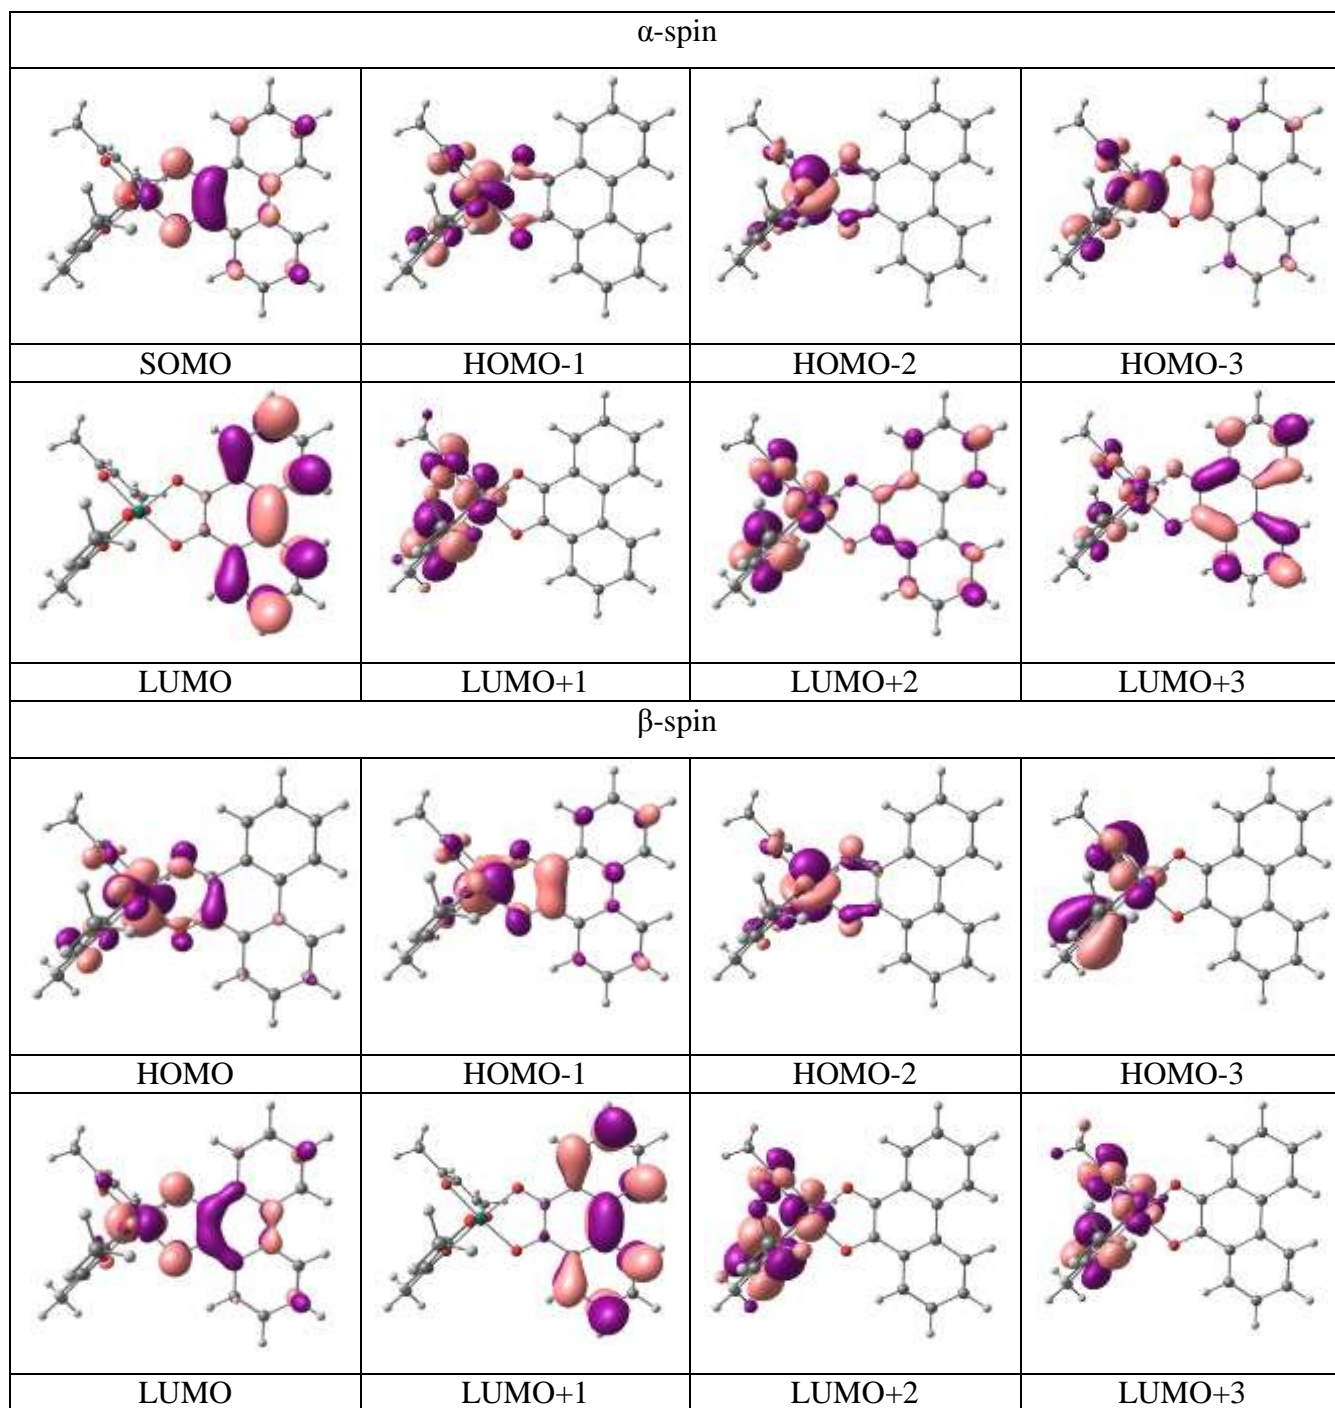

**Table S10** Selected molecular orbitals along with their energies and compositions of  $\mathbf{1}^{2-}$  in  $S = 0$  state

| MO      | Energy<br>(eV) | % Composition |      |                |
|---------|----------------|---------------|------|----------------|
|         |                | Ru            | acac | Q <sub>1</sub> |
| LUMO+10 | 7.524          | 24            | 53   | 23             |
| LUMO+9  | 7.494          | 17            | 70   | 14             |
| LUMO+8  | 7.320          | 0             | 0    | 100            |
| LUMO+7  | 6.877          | 6             | 5    | 88             |
| LUMO+6  | 6.739          | 48            | 35   | 17             |
| LUMO+5  | 6.666          | 51            | 42   | 7              |
| LUMO+4  | 6.625          | 50            | 46   | 4              |
| LUMO+3  | 5.765          | 3             | 12   | 85             |
| LUMO+2  | 5.590          | 8             | 82   | 10             |
| LUMO+1  | 5.470          | 4             | 94   | 2              |
| LUMO    | 5.373          | 2             | 1    | 97             |
| HOMO    | 3.114          | 32            | 8    | 59             |
| HOMO-1  | 2.503          | 76            | 14   | 10             |
| HOMO-2  | 2.323          | 72            | 18   | 10             |
| HOMO-3  | 1.948          | 53            | 14   | 33             |
| HOMO-4  | 0.432          | 2             | 25   | 74             |
| HOMO-5  | 0.296          | 4             | 92   | 4              |
| HOMO-6  | 0.159          | 6             | 64   | 31             |
| HOMO-7  | -0.003         | 12            | 17   | 71             |
| HOMO-8  | -0.337         | 3             | 60   | 37             |
| HOMO-9  | -0.403         | 2             | 4    | 94             |
| HOMO-10 | -0.561         | 3             | 7    | 89             |



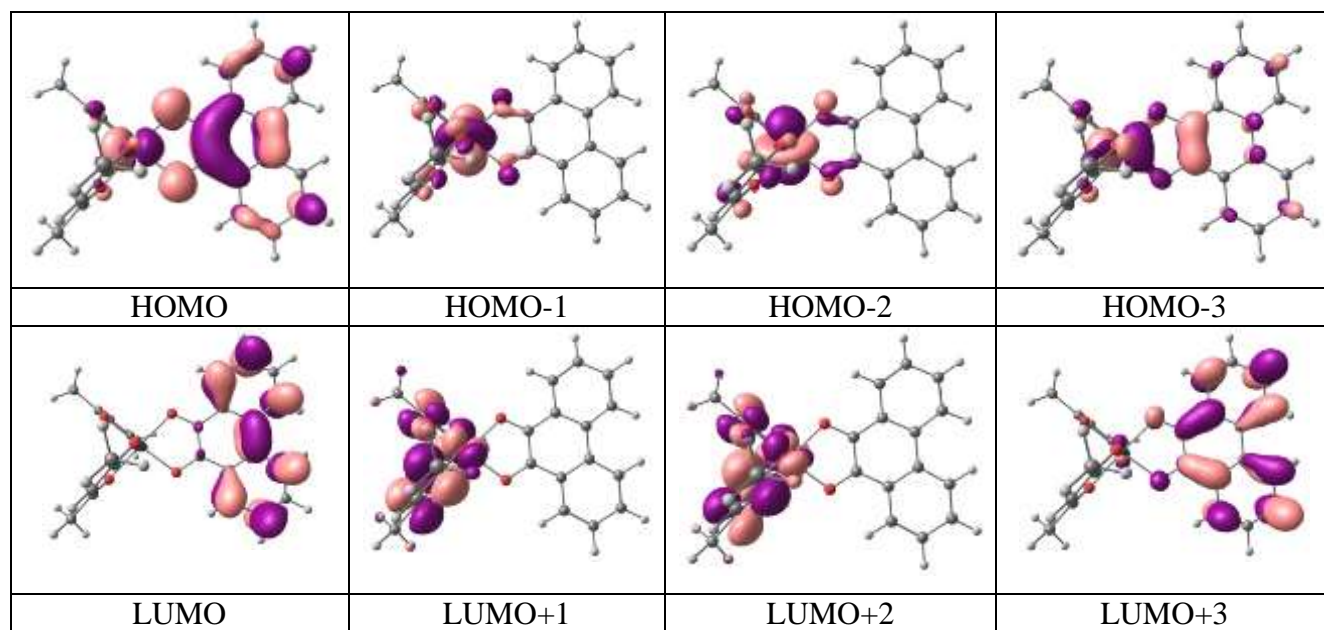

**Table S11** Selected molecular orbitals along with their energies and compositions of **2** in  $S = 0$

state

| MO      | Energy<br>(eV) | % Composition |      |                |
|---------|----------------|---------------|------|----------------|
|         |                | Ru            | acac | Q <sub>2</sub> |
| LUMO+10 | 1.306          | 50            | 20   | 30             |
| LUMO+9  | 0.981          | 66            | 18   | 16             |
| LUMO+8  | 0.750          | 73            | 20   | 7              |
| LUMO+7  | 0.707          | 2             | 1    | 97             |
| LUMO+6  | 0.460          | 70            | 10   | 20             |
| LUMO+5  | 0.311          | 2             | 1    | 97             |
| LUMO+4  | -0.445         | 3             | 94   | 2              |
| LUMO+3  | -0.454         | 5             | 89   | 6              |
| LUMO+2  | -0.785         | 1             | 5    | 94             |
| LUMO+1  | -1.109         | 1             | 0    | 99             |
| LUMO    | -2.445         | 31            | 7    | 62             |
| HOMO    | -4.628         | 65            | 25   | 10             |
| HOMO-1  | -5.010         | 49            | 27   | 25             |
| HOMO-2  | -5.066         | 60            | 24   | 16             |
| HOMO-3  | -5.789         | 15            | 76   | 9              |
| HOMO-4  | -6.059         | 25            | 58   | 17             |
| HOMO-5  | -6.321         | 10            | 13   | 78             |
| HOMO-6  | -6.612         | 4             | 89   | 8              |
| HOMO-7  | -6.955         | 3             | 32   | 65             |
| HOMO-8  | -7.029         | 8             | 69   | 23             |
| HOMO-9  | -7.230         | 4             | 23   | 73             |
| HOMO-10 | -7.609         | 14            | 71   | 15             |

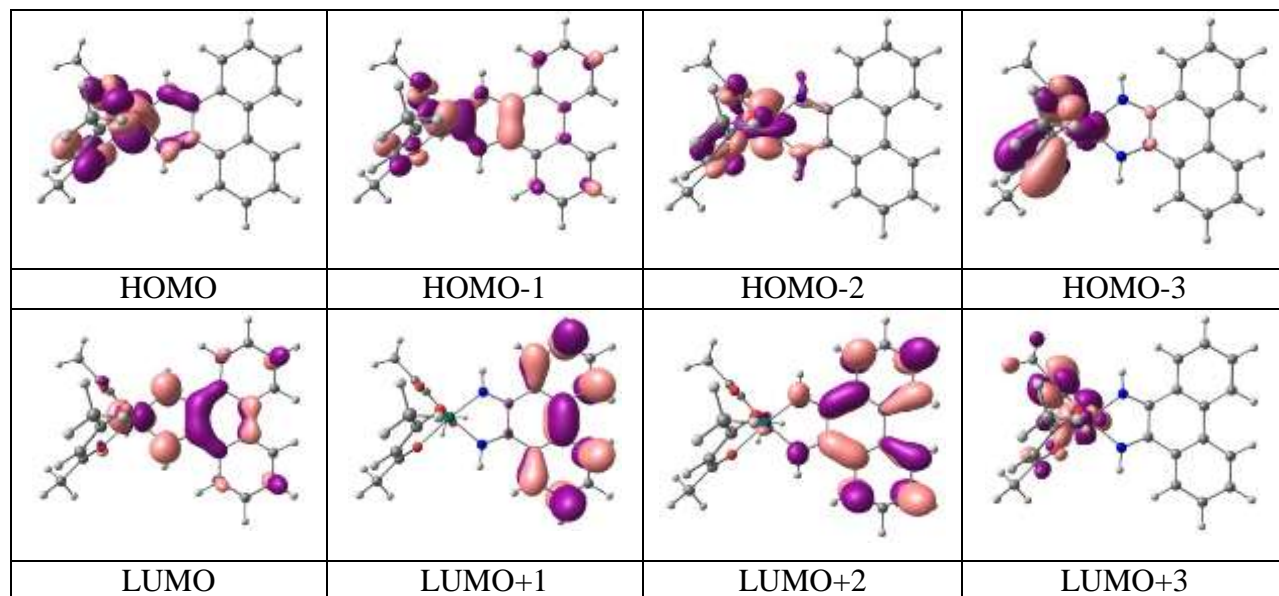

**Table S12** Selected molecular orbitals along with their energies and compositions of  $2^+$  in  $S=1/2$

state

| MO             | Energy<br>(eV) | % Composition |      |                |
|----------------|----------------|---------------|------|----------------|
|                |                | Ru            | acac | Q <sub>2</sub> |
| $\alpha$ -spin |                |               |      |                |
| LUMO+10        | -1.606         | 51            | 7    | 43             |
| LUMO+9         | -2.098         | 52            | 6    | 42             |
| LUMO+8         | -2.153         | 0             | 0    | 100            |
| LUMO+7         | -2.698         | 1             | 0    | 99             |
| LUMO+6         | -3.337         | 43            | 17   | 40             |
| LUMO+5         | -3.427         | 2             | 96   | 2              |
| LUMO+4         | -3.876         | 3             | 94   | 3              |
| LUMO+3         | -3.978         | 1             | 1    | 99             |
| LUMO+2         | -4.034         | 1             | 0    | 99             |
| LUMO+1         | -4.097         | 55            | 36   | 9              |
| LUMO           | -6.063         | 14            | 3    | 83             |
| SOMO           | -8.702         | 17            | 80   | 3              |
| HOMO-1         | -9.109         | 19            | 74   | 8              |
| HOMO-2         | -9.184         | 9             | 2    | 89             |
| HOMO-3         | -9.396         | 35            | 37   | 27             |
| HOMO-4         | -9.515         | 48            | 13   | 38             |
| HOMO-5         | -9.906         | 45            | 16   | 39             |
| HOMO-6         | -10.210        | 4             | 85   | 11             |
| HOMO-7         | -10.370        | 22            | 62   | 16             |
| HOMO-8         | -10.377        | 16            | 29   | 55             |
| HOMO-9         | -10.859        | 41            | 51   | 8              |
| HOMO-10        | -10.904        | 0             | 5    | 95             |
| $\beta$ -spin  |                |               |      |                |
| LUMO+10        | -2.094         | 53            | 6    | 41             |
| LUMO+9         | -2.153         | 0             | 0    | 100            |

|         |         |    |    |    |
|---------|---------|----|----|----|
| LUMO+8  | -2.706  | 1  | 0  | 99 |
| LUMO+7  | -3.026  | 42 | 16 | 42 |
| LUMO+6  | -3.164  | 40 | 53 | 7  |
| LUMO+5  | -3.854  | 5  | 93 | 2  |
| LUMO+4  | -3.970  | 21 | 71 | 8  |
| LUMO+3  | -4.005  | 2  | 4  | 94 |
| LUMO+2  | -4.018  | 1  | 0  | 99 |
| LUMO+1  | -6.019  | 20 | 4  | 75 |
| LUMO    | -6.199  | 70 | 21 | 9  |
| HOMO    | -8.824  | 24 | 63 | 13 |
| HOMO-1  | -9.010  | 32 | 57 | 12 |
| HOMO-2  | -9.131  | 34 | 44 | 22 |
| HOMO-3  | -9.267  | 4  | 5  | 92 |
| HOMO-4  | -9.585  | 64 | 29 | 6  |
| HOMO-5  | -10.005 | 4  | 88 | 8  |
| HOMO-6  | -10.157 | 3  | 6  | 91 |
| HOMO-7  | -10.309 | 11 | 20 | 69 |
| HOMO-8  | -10.634 | 10 | 84 | 6  |
| HOMO-9  | -10.907 | 0  | 6  | 94 |
| HOMO-10 | -11.325 | 20 | 68 | 12 |

---

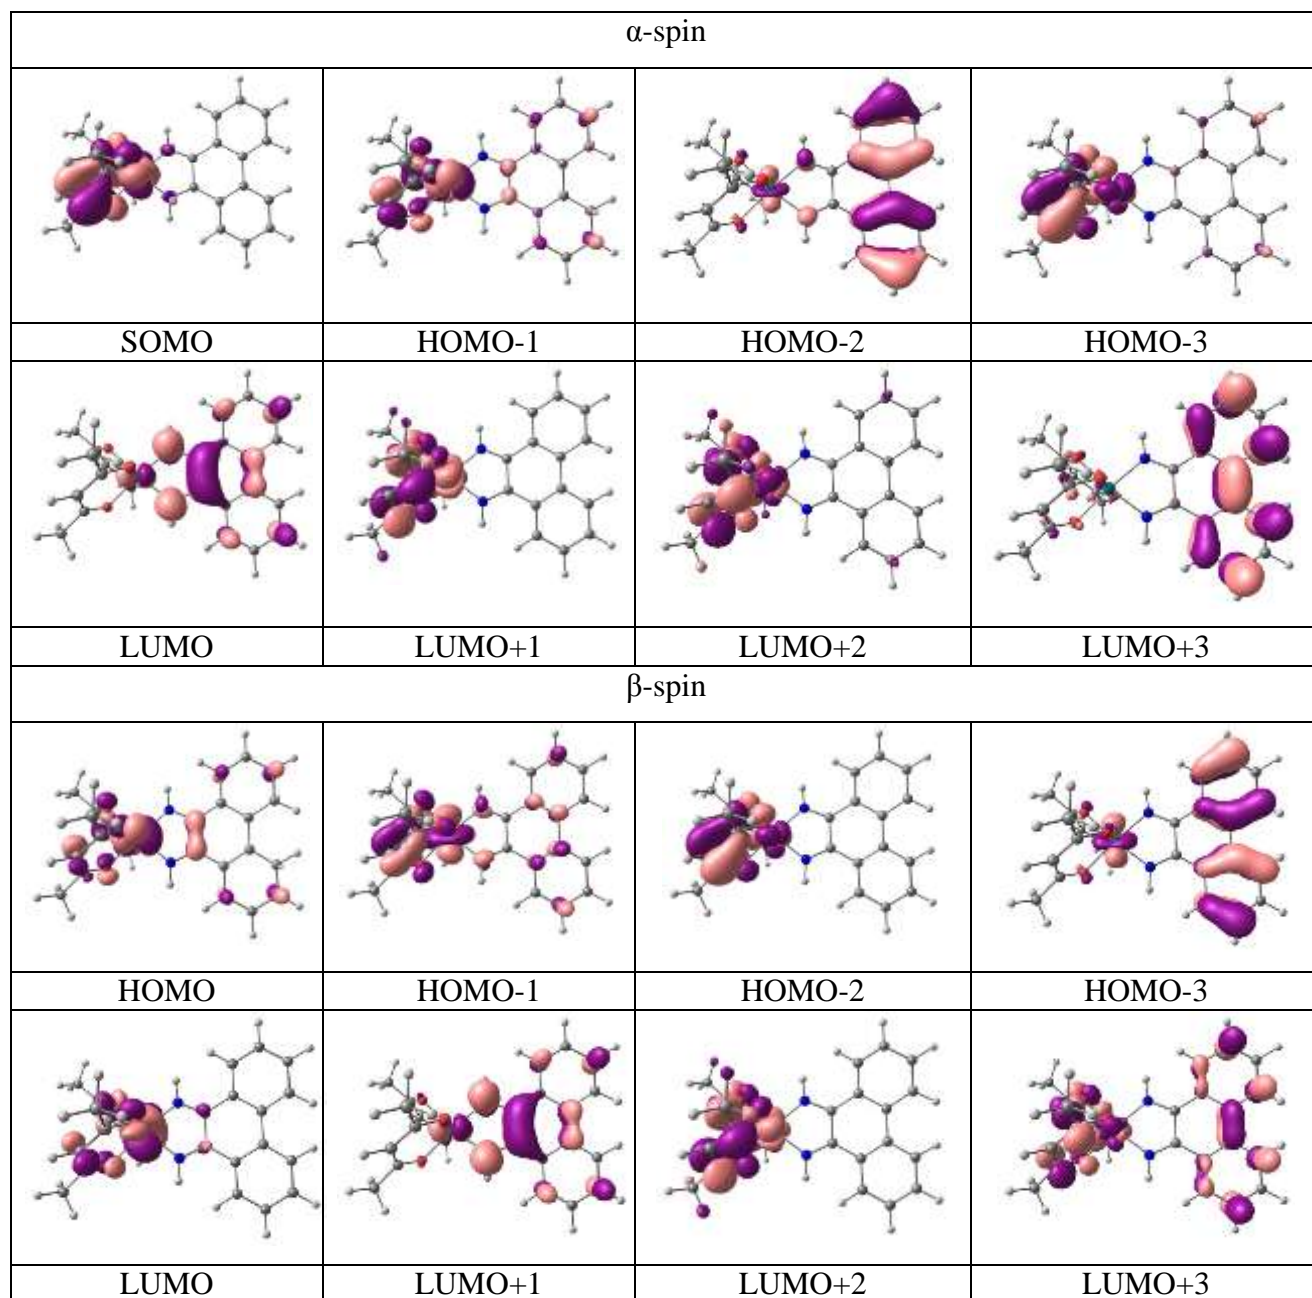

**Table S13** Selected molecular orbitals along with their energies and compositions of  $2^-$  in  $S=1/2$

state

| MO             | Energy<br>(eV) | % Composition |      |                |
|----------------|----------------|---------------|------|----------------|
|                |                | Ru            | acac | Q <sub>2</sub> |
| $\alpha$ -spin |                |               |      |                |
| LUMO+10        | 4.430          | 26            | 33   | 41             |
| LUMO+9         | 4.071          | 44            | 42   | 15             |
| LUMO+8         | 4.054          | 1             | 1    | 98             |
| LUMO+7         | 4.024          | 60            | 37   | 3              |
| LUMO+6         | 3.950          | 62            | 31   | 6              |
| LUMO+5         | 3.616          | 10            | 4    | 85             |
| LUMO+4         | 3.567          | 68            | 15   | 17             |
| LUMO+3         | 2.587          | 5             | 46   | 48             |
| LUMO+2         | 2.526          | 2             | 54   | 43             |
| LUMO+1         | 2.477          | 2             | 96   | 2              |
| LUMO           | 2.173          | 1             | 0    | 98             |
| SOMO           | -0.127         | 22            | 5    | 73             |
| HOMO-1         | -1.048         | 73            | 17   | 10             |
| HOMO-2         | -1.447         | 74            | 17   | 9              |
| HOMO-3         | -1.846         | 54            | 24   | 22             |
| HOMO-4         | -2.722         | 9             | 85   | 6              |
| HOMO-5         | -2.797         | 9             | 49   | 42             |
| HOMO-6         | -2.987         | 11            | 36   | 53             |
| HOMO-7         | -3.508         | 3             | 88   | 9              |
| HOMO-8         | -3.595         | 4             | 8    | 88             |
| HOMO-9         | -3.844         | 6             | 82   | 12             |
| HOMO-10        | -3.875         | 5             | 12   | 83             |
| $\beta$ -spin  |                |               |      |                |
| LUMO+10        | 4.150          | 41            | 44   | 15             |
| LUMO+9         | 4.132          | 46            | 31   | 23             |

|         |        |    |    |    |
|---------|--------|----|----|----|
| LUMO+8  | 4.114  | 1  | 0  | 99 |
| LUMO+7  | 3.985  | 63 | 31 | 6  |
| LUMO+6  | 3.807  | 43 | 23 | 34 |
| LUMO+5  | 3.576  | 68 | 15 | 17 |
| LUMO+4  | 2.727  | 3  | 3  | 94 |
| LUMO+3  | 2.581  | 6  | 89 | 5  |
| LUMO+2  | 2.571  | 6  | 89 | 5  |
| LUMO+1  | 2.222  | 2  | 2  | 95 |
| LUMO    | 1.548  | 26 | 13 | 62 |
| HOMO    | -0.846 | 72 | 15 | 13 |
| HOMO-1  | -1.102 | 52 | 15 | 33 |
| HOMO-2  | -1.288 | 73 | 17 | 9  |
| HOMO-3  | -2.601 | 6  | 34 | 60 |
| HOMO-4  | -2.661 | 4  | 86 | 11 |
| HOMO-5  | -2.926 | 14 | 61 | 25 |
| HOMO-6  | -3.372 | 5  | 8  | 87 |
| HOMO-7  | -3.478 | 3  | 87 | 11 |
| HOMO-8  | -3.639 | 5  | 11 | 84 |
| HOMO-9  | -3.813 | 5  | 81 | 13 |
| HOMO-10 | -4.302 | 8  | 80 | 12 |

---



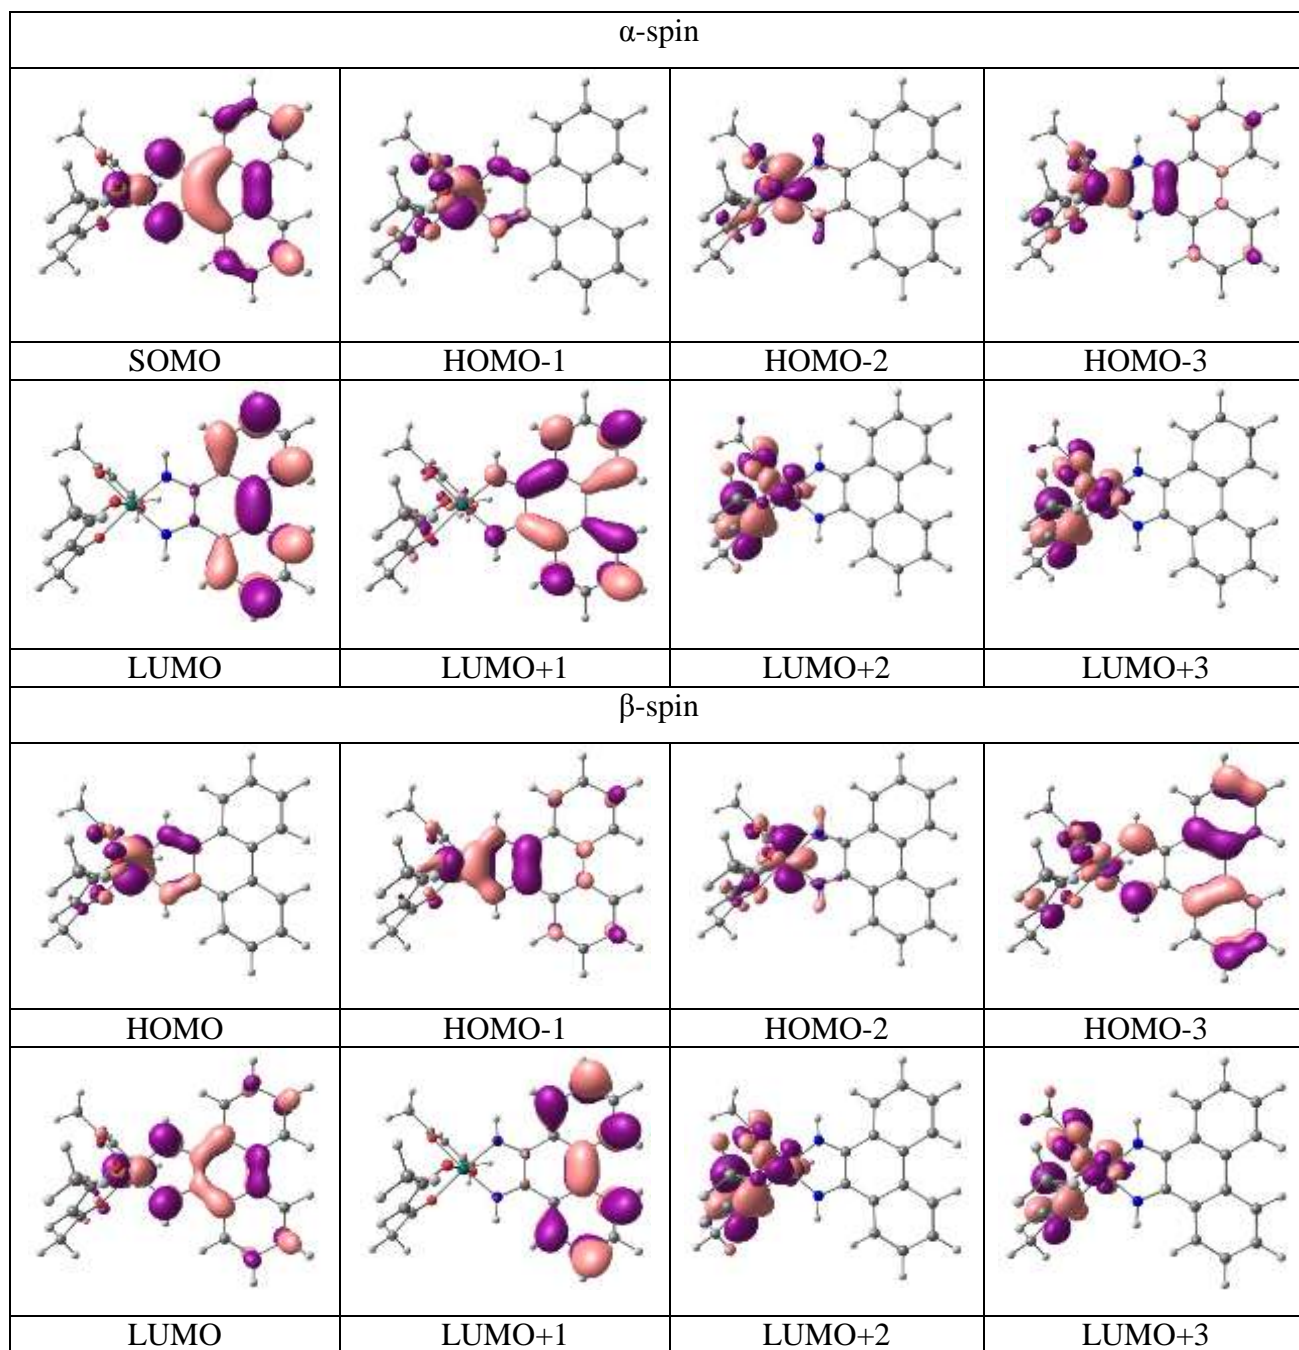

**Table S14** Selected molecular orbitals along with their energies and compositions of  $2^{2-}$  in  $S=0$  state

| MO      | Energy<br>(eV) | % Composition |      |                |
|---------|----------------|---------------|------|----------------|
|         |                | Ru            | acac | Q <sub>2</sub> |
| LUMO+10 | 7.749          | 4             | 42   | 54             |
| LUMO+9  | 7.558          | 18            | 70   | 12             |
| LUMO+8  | 7.387          | 0             | 0    | 100            |
| LUMO+7  | 7.131          | 9             | 12   | 80             |
| LUMO+6  | 6.577          | 54            | 42   | 5              |
| LUMO+5  | 6.565          | 54            | 42   | 5              |
| LUMO+4  | 6.272          | 66            | 24   | 10             |
| LUMO+3  | 5.867          | 3             | 3    | 94             |
| LUMO+2  | 5.570          | 7             | 88   | 5              |
| LUMO+1  | 5.503          | 5             | 89   | 6              |
| LUMO    | 5.429          | 3             | 7    | 90             |
| HOMO    | 3.706          | 25            | 9    | 66             |
| HOMO-1  | 2.646          | 74            | 12   | 14             |
| HOMO-2  | 2.207          | 76            | 17   | 8              |
| HOMO-3  | 1.996          | 58            | 15   | 27             |
| HOMO-4  | 0.790          | 7             | 13   | 80             |
| HOMO-5  | 0.335          | 3             | 91   | 6              |
| HOMO-6  | 0.173          | 9             | 75   | 16             |
| HOMO-7  | -0.119         | 5             | 11   | 83             |
| HOMO-8  | -0.311         | 3             | 53   | 44             |
| HOMO-9  | -0.440         | 5             | 54   | 41             |
| HOMO-10 | -0.679         | 5             | 73   | 22             |

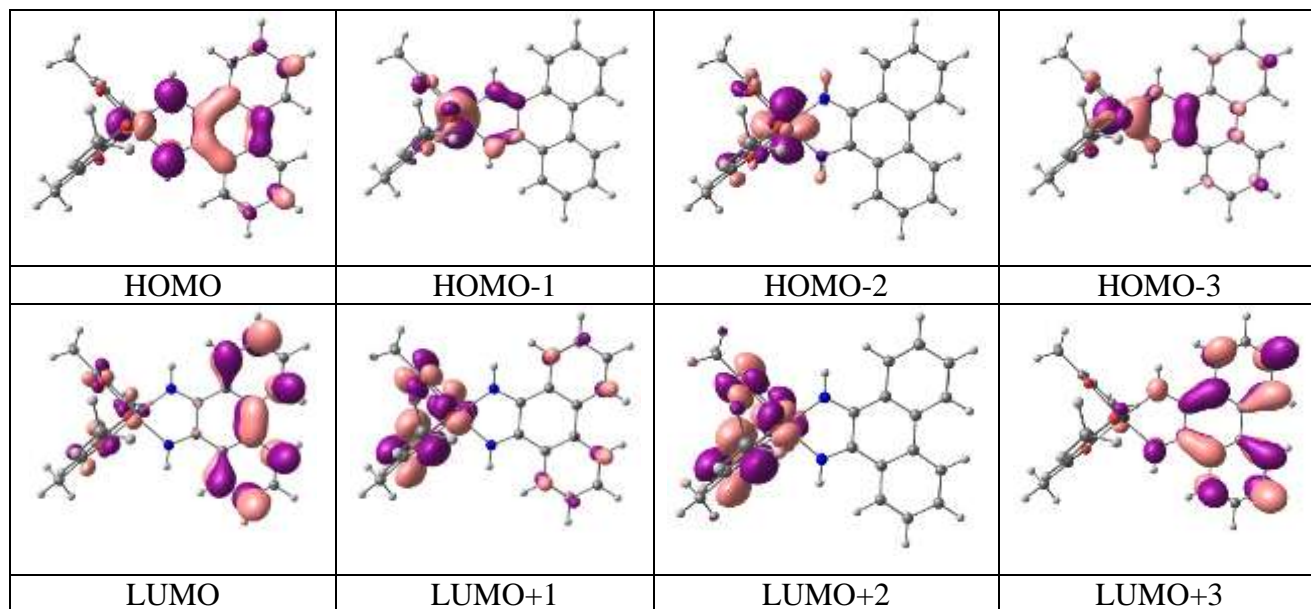

**Table S15** Selected molecular orbitals along with their energies and compositions of **3** in  $S = 0$

state

| MO      | Energy<br>(eV) | % Composition |      |                |
|---------|----------------|---------------|------|----------------|
|         |                | Ru            | acac | Q <sub>3</sub> |
| LUMO+10 | 1.320          | 75            | 19   | 6              |
| LUMO+9  | 0.891          | 40            | 24   | 36             |
| LUMO+8  | 0.755          | 67            | 12   | 21             |
| LUMO+7  | 0.553          | 2             | 1    | 97             |
| LUMO+6  | 0.248          | 49            | 41   | 10             |
| LUMO+5  | 0.219          | 1             | 1    | 98             |
| LUMO+4  | -0.488         | 3             | 95   | 2              |
| LUMO+3  | -0.651         | 6             | 90   | 4              |
| LUMO+2  | -0.853         | 1             | 3    | 96             |
| LUMO+1  | -1.110         | 1             | 0    | 99             |
| LUMO    | -2.795         | 33            | 8    | 59             |
| HOMO    | -4.827         | 63            | 29   | 8              |
| HOMO-1  | -5.129         | 51            | 26   | 23             |
| HOMO-2  | -5.231         | 58            | 21   | 21             |
| HOMO-3  | -5.928         | 18            | 74   | 8              |
| HOMO-4  | -6.197         | 20            | 54   | 26             |
| HOMO-5  | -6.355         | 10            | 18   | 72             |
| HOMO-6  | -6.738         | 4             | 90   | 6              |
| HOMO-7  | -7.072         | 3             | 7    | 90             |
| HOMO-8  | -7.219         | 5             | 63   | 32             |
| HOMO-9  | -7.331         | 8             | 42   | 51             |
| HOMO-10 | -7.725         | 12            | 66   | 22             |

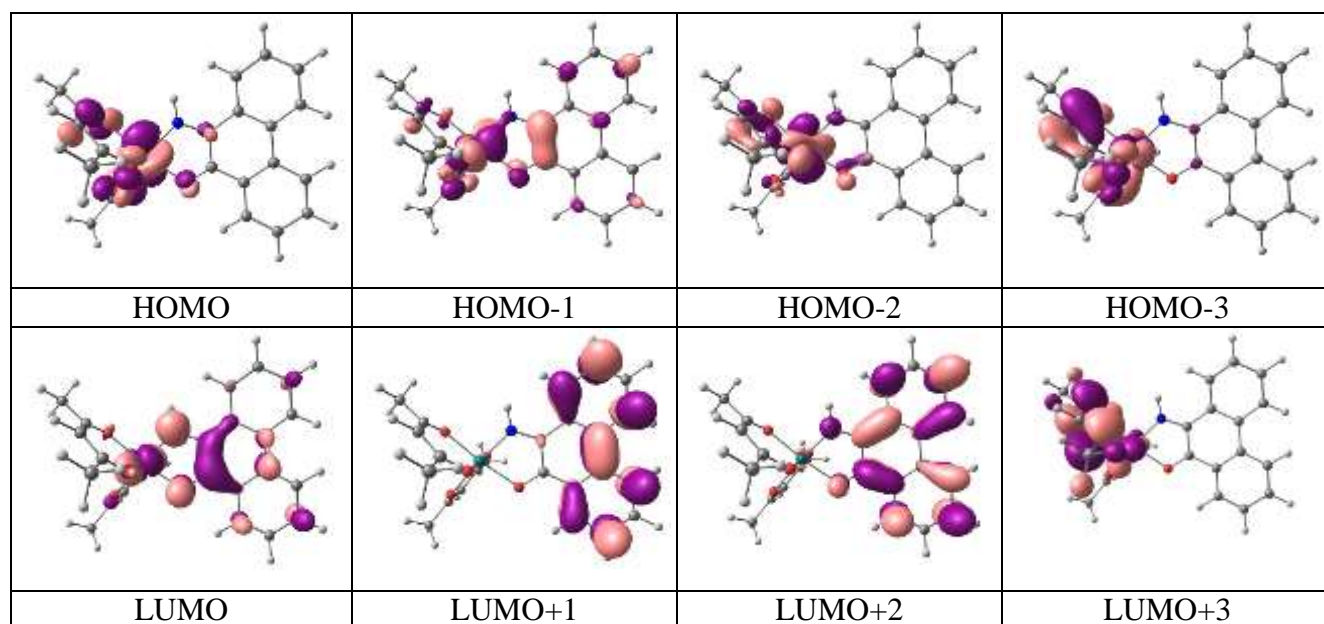

**Table S16** Selected molecular orbitals along with their energies and compositions of  $3^+$  in  $S =$

1/2 state

| MO             | Energy<br>(eV) | % Composition |      |                |
|----------------|----------------|---------------|------|----------------|
|                |                | Ru            | acac | Q <sub>3</sub> |
| $\alpha$ -spin |                |               |      |                |
| LUMO+10        | -1.515         | 72            | 20   | 9              |
| LUMO+9         | -1.969         | 43            | 6    | 50             |
| LUMO+8         | -2.215         | 0             | 0    | 100            |
| LUMO+7         | -2.783         | 0             | 0    | 99             |
| LUMO+6         | -3.449         | 40            | 39   | 21             |
| LUMO+5         | -3.764         | 16            | 74   | 10             |
| LUMO+4         | -4.013         | 3             | 30   | 67             |
| LUMO+3         | -4.031         | 2             | 63   | 35             |
| LUMO+2         | -4.057         | 1             | 5    | 95             |
| LUMO+1         | -4.253         | 56            | 29   | 15             |
| LUMO           | -6.390         | 13            | 3    | 84             |
| SOMO           | -8.789         | 17            | 80   | 3              |
| HOMO-1         | -9.196         | 24            | 65   | 11             |
| HOMO-2         | -9.307         | 6             | 6    | 88             |
| HOMO-3         | -9.498         | 37            | 32   | 30             |
| HOMO-4         | -9.508         | 56            | 24   | 20             |
| HOMO-5         | -10.047        | 25            | 10   | 65             |
| HOMO-6         | -10.327        | 5             | 86   | 9              |
| HOMO-7         | -10.431        | 28            | 51   | 20             |
| HOMO-8         | -10.467        | 22            | 27   | 51             |
| HOMO-9         | -10.971        | 13            | 26   | 60             |
| HOMO-10        | -11.008        | 28            | 47   | 25             |
| $\beta$ -spin  |                |               |      |                |
| LUMO+10        | -1.964         | 44            | 6    | 50             |
| LUMO+9         | -2.220         | 0             | 0    | 100            |

---

|         |         |    |    |    |
|---------|---------|----|----|----|
| LUMO+8  | -2.797  | 0  | 0  | 99 |
| LUMO+7  | -3.164  | 48 | 25 | 27 |
| LUMO+6  | -3.479  | 3  | 95 | 3  |
| LUMO+5  | -3.988  | 19 | 68 | 13 |
| LUMO+4  | -4.012  | 19 | 35 | 47 |
| LUMO+3  | -4.049  | 33 | 20 | 47 |
| LUMO+2  | -4.173  | 1  | 3  | 96 |
| LUMO+1  | -6.252  | 28 | 7  | 65 |
| LUMO    | -6.383  | 62 | 23 | 15 |
| HOMO    | -8.896  | 27 | 57 | 17 |
| HOMO-1  | -9.074  | 39 | 46 | 14 |
| HOMO-2  | -9.203  | 19 | 27 | 53 |
| HOMO-3  | -9.345  | 24 | 30 | 46 |
| HOMO-4  | -9.619  | 55 | 35 | 9  |
| HOMO-5  | -10.127 | 3  | 5  | 92 |
| HOMO-6  | -10.269 | 4  | 90 | 6  |
| HOMO-7  | -10.423 | 9  | 24 | 67 |
| HOMO-8  | -10.789 | 11 | 78 | 11 |
| HOMO-9  | -10.982 | 1  | 5  | 94 |
| HOMO-10 | -11.388 | 18 | 65 | 17 |

---

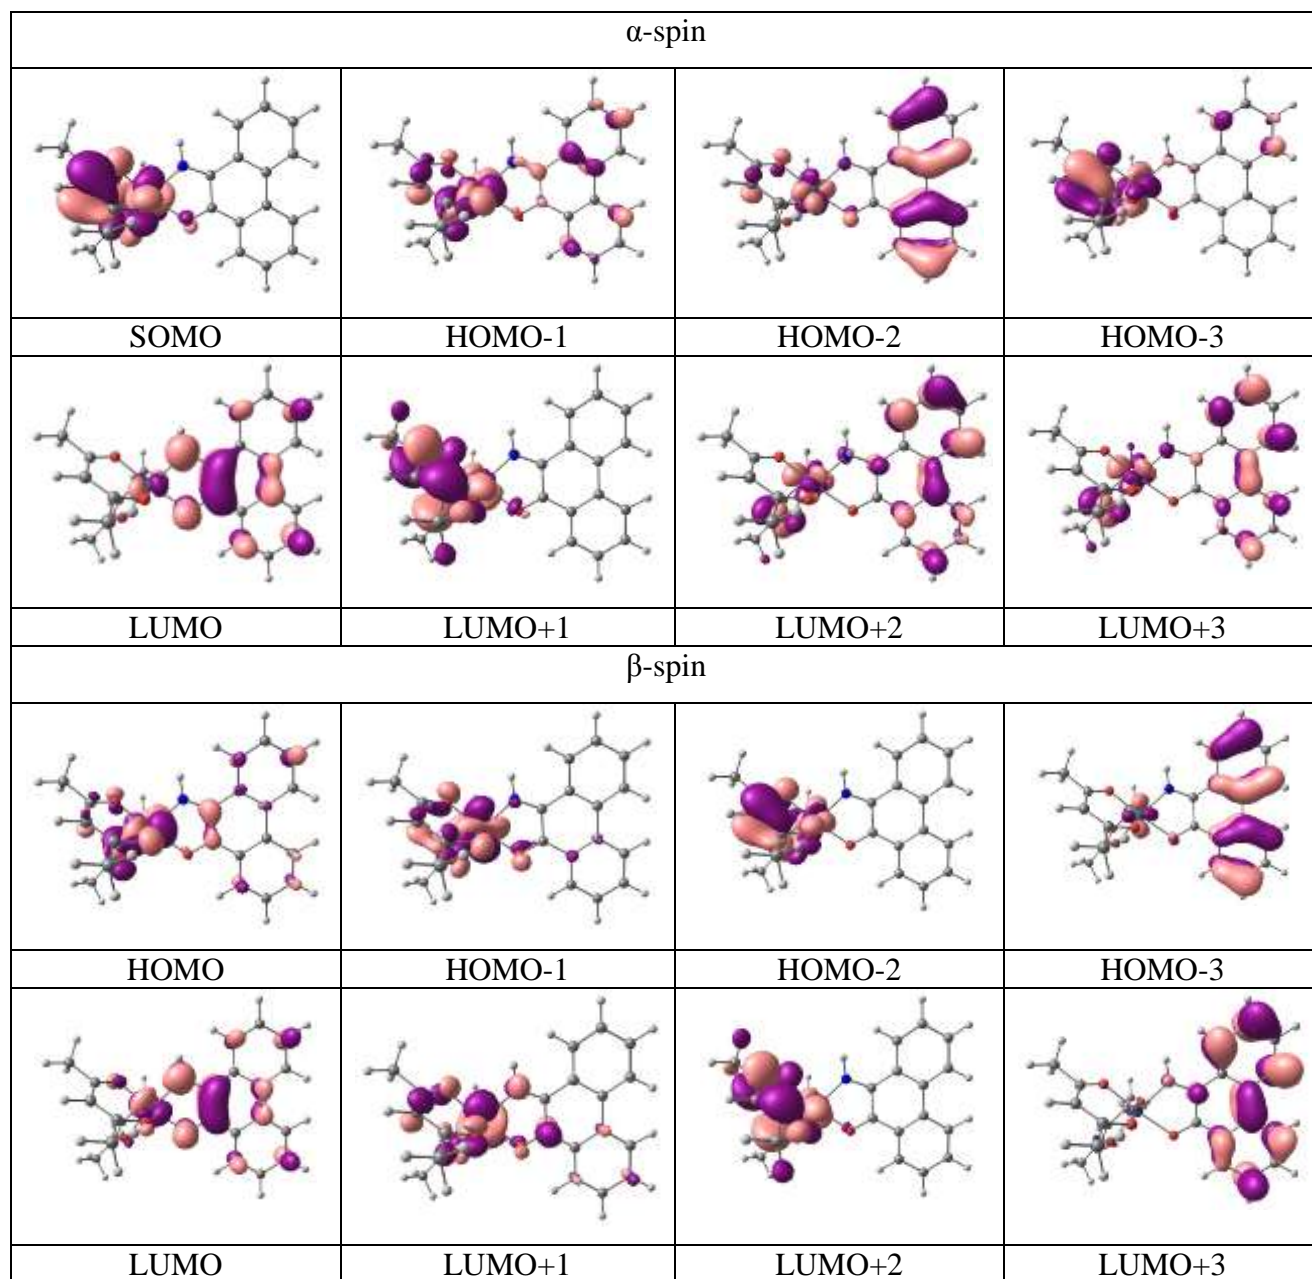



**Table S17** Selected molecular orbitals along with their energies and compositions of  $3^-$  in  $S =$

1/2 state

| MO             | Energy<br>(eV) | % Composition |      |                |
|----------------|----------------|---------------|------|----------------|
|                |                | Ru            | acac | Q <sub>3</sub> |
| $\alpha$ -spin |                |               |      |                |
| LUMO+10        | 4.138          | 34            | 35   | 31             |
| LUMO+9         | 4.071          | 60            | 34   | 7              |
| LUMO+8         | 4.051          | 1             | 1    | 98             |
| LUMO+7         | 4.004          | 60            | 37   | 3              |
| LUMO+6         | 3.798          | 52            | 38   | 10             |
| LUMO+5         | 3.749          | 62            | 18   | 20             |
| LUMO+4         | 3.546          | 4             | 2    | 94             |
| LUMO+3         | 2.556          | 5             | 71   | 24             |
| LUMO+2         | 2.453          | 1             | 31   | 67             |
| LUMO+1         | 2.403          | 3             | 93   | 4              |
| LUMO           | 2.163          | 1             | 1    | 98             |
| SOMO           | -0.491         | 22            | 5    | 73             |
| HOMO-1         | -1.265         | 72            | 21   | 8              |
| HOMO-2         | -1.540         | 74            | 15   | 11             |
| HOMO-3         | -1.976         | 54            | 24   | 22             |
| HOMO-4         | -2.798         | 11            | 84   | 5              |
| HOMO-5         | -2.905         | 5             | 36   | 59             |
| HOMO-6         | -3.049         | 11            | 49   | 40             |
| HOMO-7         | -3.582         | 3             | 84   | 12             |
| HOMO-8         | -3.715         | 2             | 7    | 91             |
| HOMO-9         | -3.837         | 8             | 40   | 52             |
| HOMO-10        | -3.965         | 5             | 14   | 81             |
| $\beta$ -spin  |                |               |      |                |
| LUMO+10        | 4.131          | 53            | 39   | 8              |
| LUMO+9         | 4.078          | 7             | 5    | 88             |

|         |        |    |    |    |
|---------|--------|----|----|----|
| LUMO+8  | 4.037  | 52 | 35 | 13 |
| LUMO+7  | 3.933  | 56 | 35 | 8  |
| LUMO+6  | 3.778  | 28 | 14 | 57 |
| LUMO+5  | 3.729  | 62 | 19 | 19 |
| LUMO+4  | 2.671  | 2  | 3  | 95 |
| LUMO+3  | 2.561  | 5  | 92 | 3  |
| LUMO+2  | 2.449  | 7  | 86 | 7  |
| LUMO+1  | 2.206  | 2  | 3  | 95 |
| LUMO    | 1.316  | 28 | 12 | 60 |
| HOMO    | -1.032 | 63 | 16 | 21 |
| HOMO-1  | -1.242 | 59 | 18 | 22 |
| HOMO-2  | -1.356 | 73 | 16 | 11 |
| HOMO-3  | -2.737 | 6  | 91 | 4  |
| HOMO-4  | -2.776 | 4  | 23 | 73 |
| HOMO-5  | -2.994 | 11 | 64 | 25 |
| HOMO-6  | -3.506 | 3  | 35 | 62 |
| HOMO-7  | -3.558 | 3  | 67 | 30 |
| HOMO-8  | -3.720 | 5  | 11 | 84 |
| HOMO-9  | -3.785 | 8  | 36 | 56 |
| HOMO-10 | -4.213 | 8  | 70 | 22 |

---

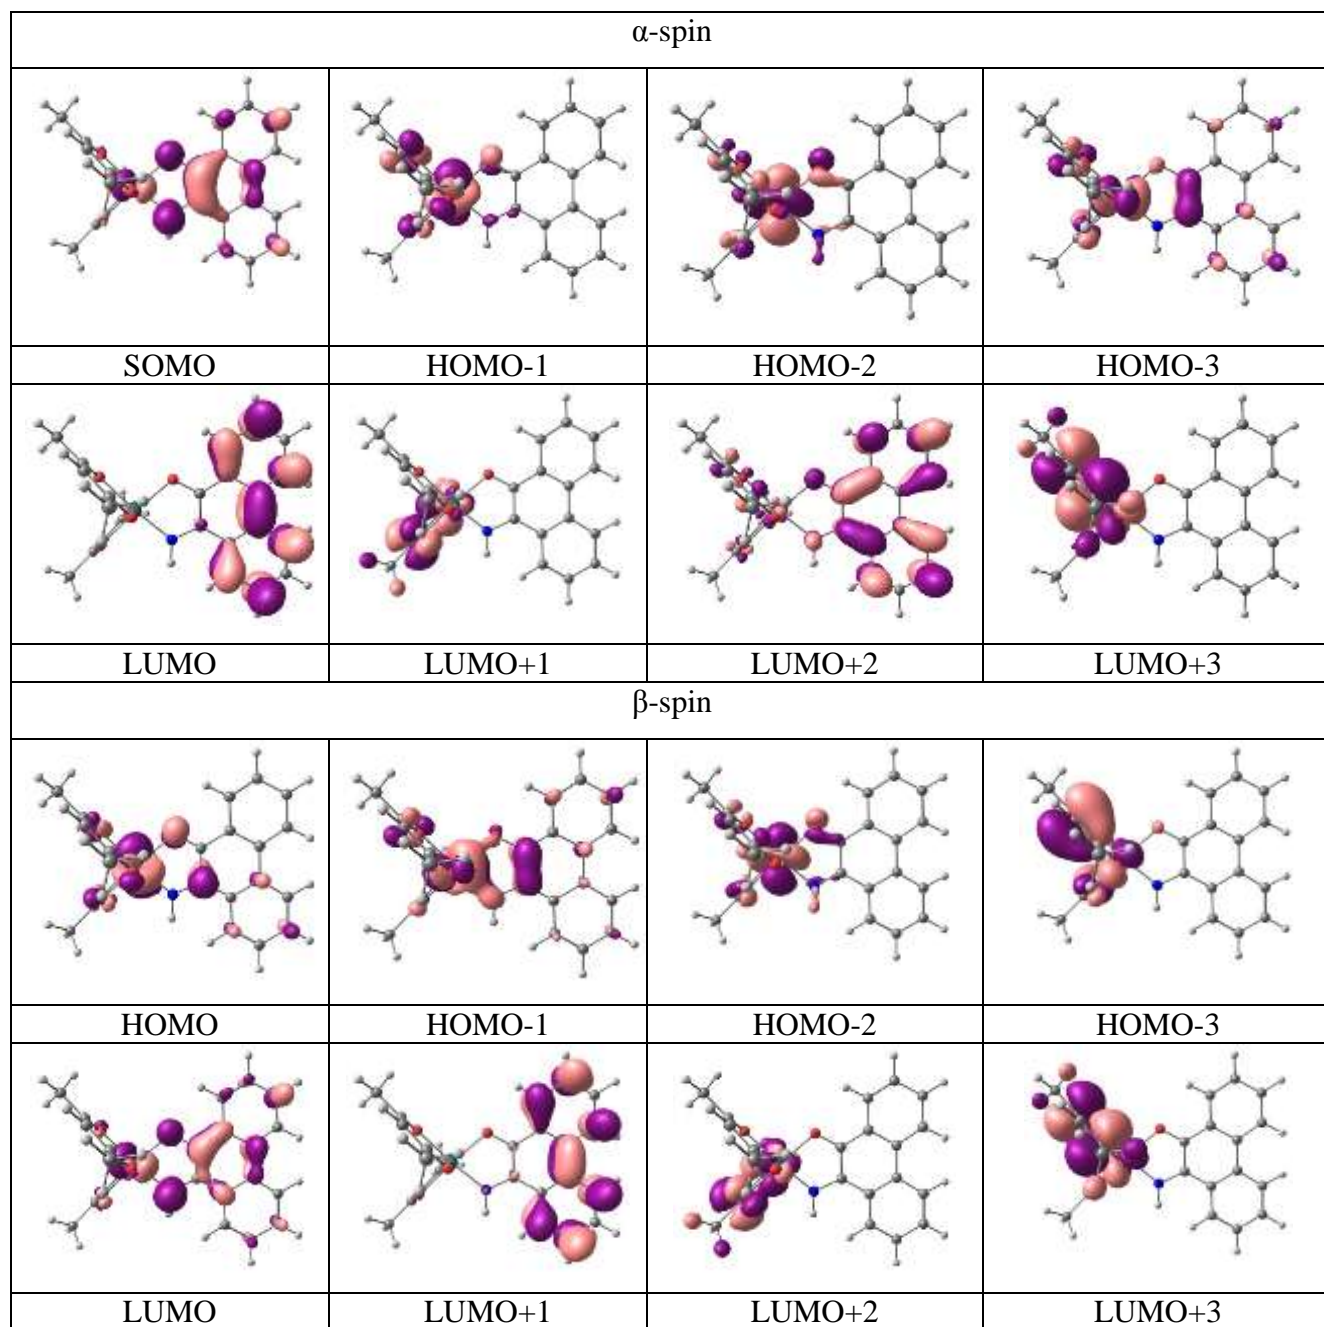

**Table S18** Selected molecular orbitals along with their energies and compositions of  $3^{2-}$  in  $S=0$  state

| MO      | Energy<br>(eV) | % Composition |      |                |
|---------|----------------|---------------|------|----------------|
|         |                | Ru            | acac | Q <sub>3</sub> |
| LUMO+10 | 7.681          | 6             | 32   | 62             |
| LUMO+9  | 7.544          | 23            | 69   | 9              |
| LUMO+8  | 7.338          | 0             | 0    | 100            |
| LUMO+7  | 6.961          | 8             | 9    | 84             |
| LUMO+6  | 6.646          | 50            | 42   | 8              |
| LUMO+5  | 6.608          | 52            | 44   | 3              |
| LUMO+4  | 6.499          | 59            | 29   | 13             |
| LUMO+3  | 5.779          | 3             | 4    | 93             |
| LUMO+2  | 5.608          | 7             | 88   | 5              |
| LUMO+1  | 5.498          | 5             | 91   | 4              |
| LUMO    | 5.377          | 2             | 4    | 94             |
| HOMO    | 3.428          | 28            | 8    | 63             |
| HOMO-1  | 2.582          | 76            | 14   | 10             |
| HOMO-2  | 2.296          | 72            | 17   | 10             |
| HOMO-3  | 1.994          | 56            | 14   | 30             |
| HOMO-4  | 0.579          | 3             | 15   | 82             |
| HOMO-5  | 0.340          | 4             | 92   | 4              |
| HOMO-6  | 0.178          | 7             | 73   | 19             |
| HOMO-7  | -0.120         | 8             | 22   | 70             |
| HOMO-8  | -0.238         | 5             | 9    | 86             |
| HOMO-9  | -0.385         | 3             | 62   | 35             |
| HOMO-10 | -0.506         | 5             | 37   | 59             |

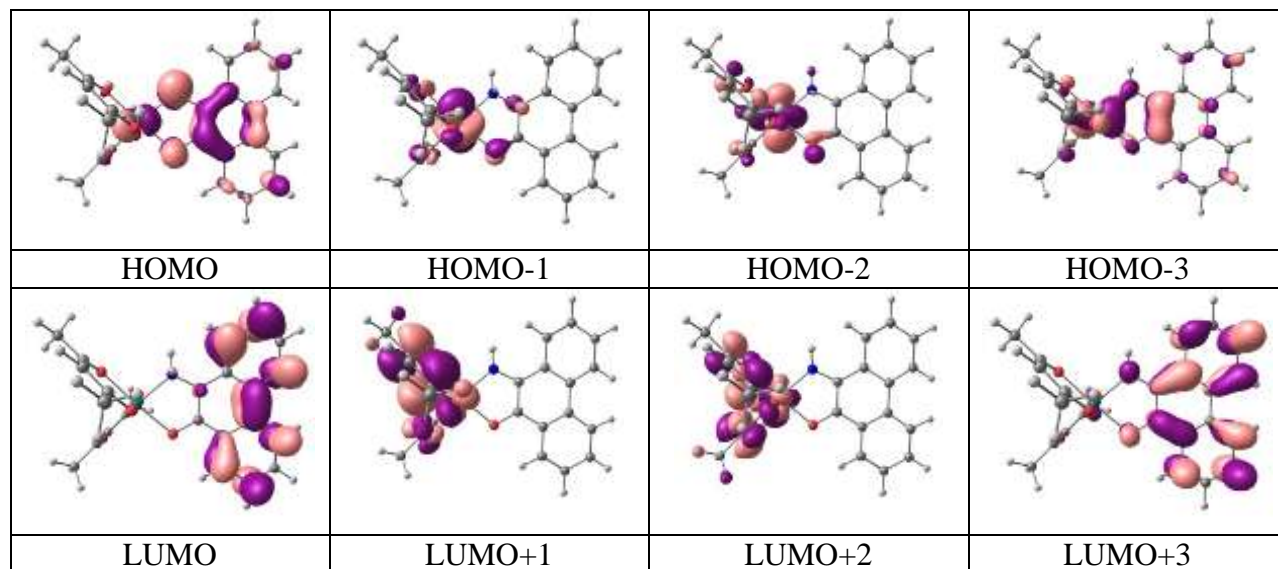

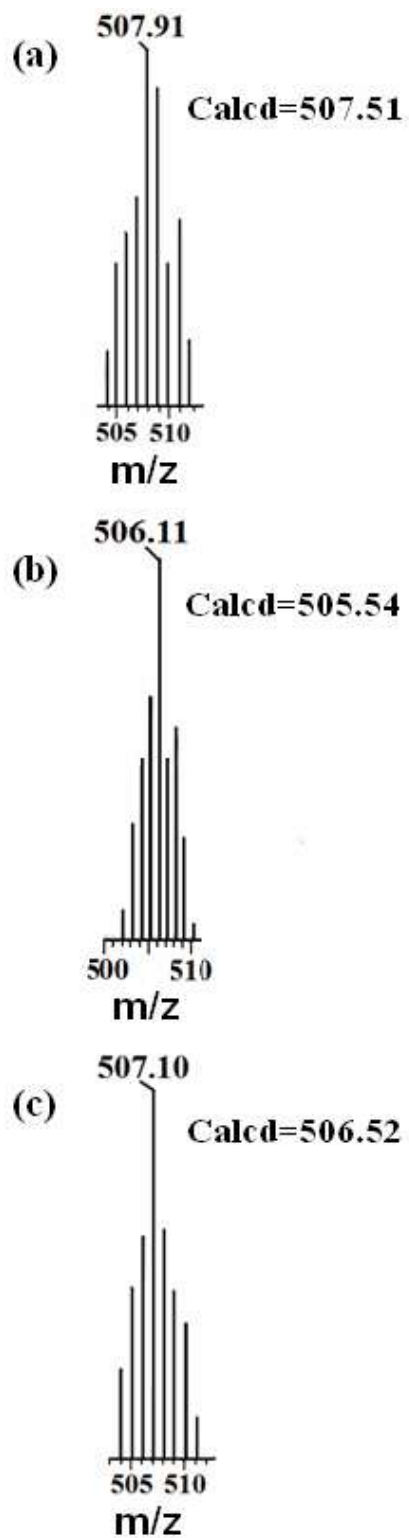

**Fig. S1** ESI-MS of (a) **1**, (b) **2** and (c) **3** in acetonitrile.

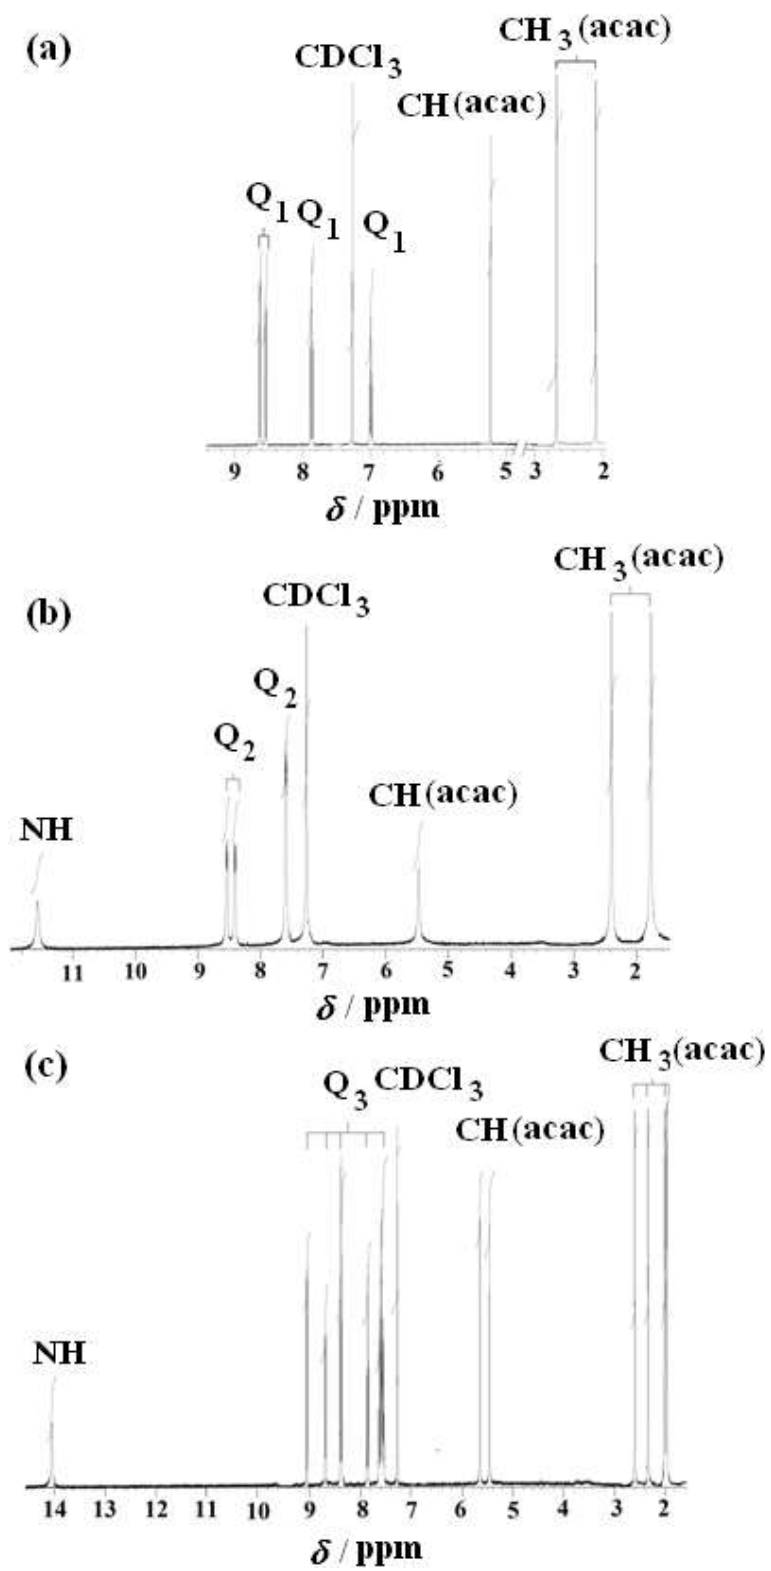

**Fig. S2**  $^1\text{H}$  NMR spectra of (a) **1**, (b) **2** and (c) **3** in  $\text{CDCl}_3$ .

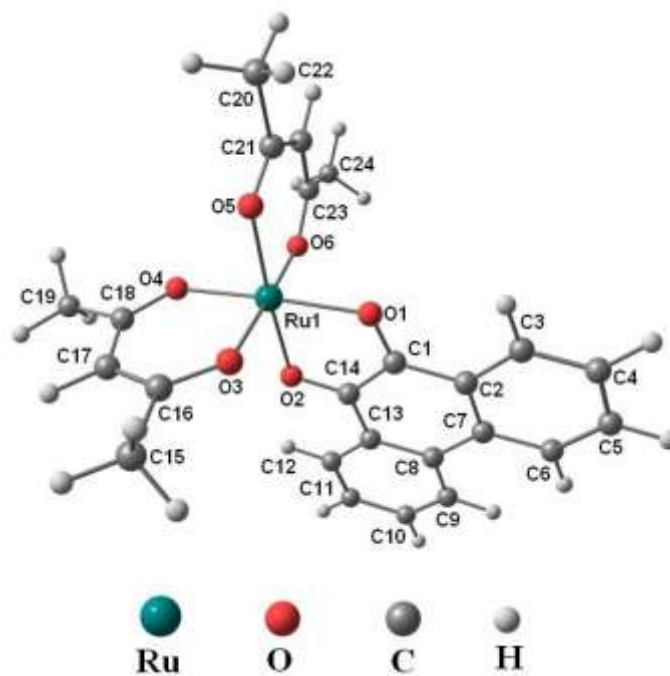

**Fig. S3** DFT optimised structure of **1**.



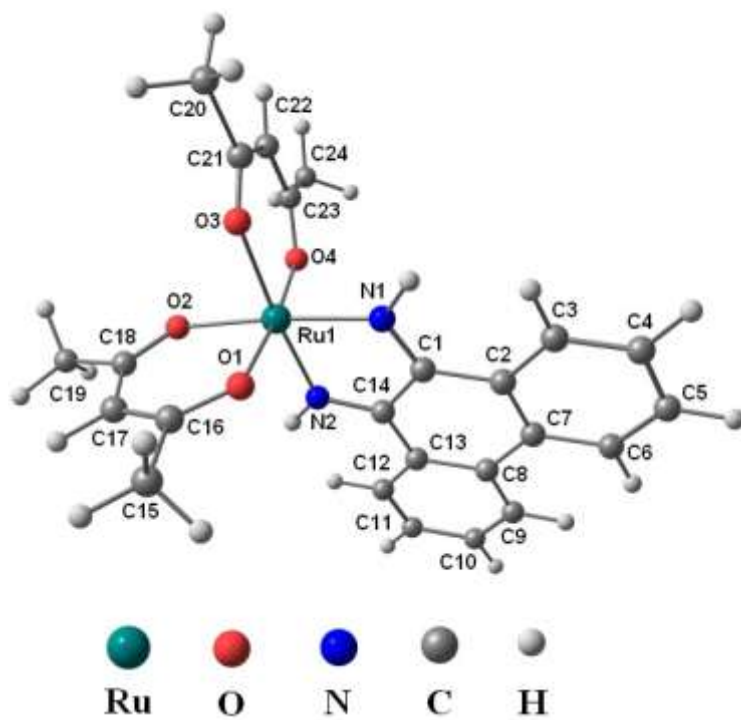

**Fig. S4** DFT optimised structure of **2** (molecule A).

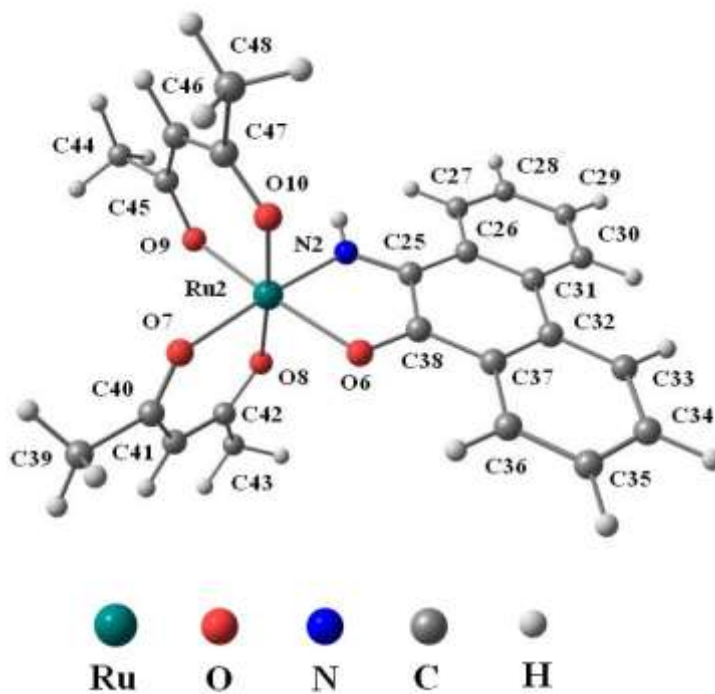

**Fig. S5** DFT optimised structure of **3** (molecule **F**).
